---

# TOWARDS IN-SILICO CLIP-SEQ: PREDICTING PROTEIN-RNA INTERACTION VIA SEQUENCE-TO-SIGNAL LEARNING

---

A bioRxiv PREPRINT

**Marc Horlacher**<sup>1,2,3,6,\*</sup>      **Nils Wagner**<sup>3,6</sup>      **Lambert Moyon**<sup>1</sup>  
marc.horlacher@helmholtz-muenchen.de      wagnern@in.tum.de      lambert.moyon@helmholtz-muenchen.de

**Klara Kuret**<sup>4,5</sup>      **Nicolas Goedert**<sup>1</sup>      **Marco Salvatore**<sup>2</sup>  
klara.kuret@crick.ac.uk      nicolas.goedert@helmholtz-muenchen.de      marco.salvatore@bio.ku.dk

**Jernej Ule**<sup>4,5</sup>      **Julien Gagneur**<sup>1,3,6</sup>      **Ole Winther**<sup>2,\*</sup>  
jernej.ule@crick.ac.uk      gagneur@in.tum.de      ole.winther@bio.ku.dk

**Annalisa Marsico**<sup>1,6,\*</sup>  
annalisa.marsico@helmholtz-muenchen.de

<sup>1</sup> Computational Health Center, Helmholtz Center Munich, Germany  
<sup>2</sup> Department of Biology, University of Copenhagen, Denmark  
<sup>3</sup> Department of Informatics, Technical University of Munich, Garching, Germany  
<sup>4</sup> National Institute of Chemistry, Ljubljana, Slovenia  
<sup>5</sup> The Francis Crick Institute, London, UK  
<sup>6</sup> Helmholtz Association - Munich School for Data Science (MUDS), Munich, Germany

September 28, 2022

## ABSTRACT

1      Unraveling sequence determinants which drive protein-RNA interaction is crucial for studying  
2      binding mechanisms and the impact of genomic variants. While CLIP-seq allows for transcriptome-  
3      wide profiling of *in vivo* protein-RNA interactions, it is limited to expressed transcripts, requiring  
4      computational imputation of missing binding information. Existing classification-based methods  
5      predict binding with low resolution and depend on prior labeling of transcriptome regions for training.  
6      We present RBPNet, a novel deep learning method, which predicts CLIP crosslink count distribution  
7      from RNA sequence at single-nucleotide resolution. By training on up to a million regions, RBPNet  
8      achieves high generalization on eCLIP, iCLIP and miCLIP assays, outperforming state-of-the-art  
9      classifiers. CLIP-seq suffers from various technical biases, complicating downstream interpretation.  
10      RBPNet performs bias correction by modeling the raw signal as a mixture of the protein-specific  
11      and background signal. Through model interrogation via Integrated Gradients, RBPNet identifies  
12      predictive sub-sequences corresponding to known binding motifs and enables variant-impact scoring  
13      via *in silico* mutagenesis. Together, RBPNet improves inference of protein-RNA interaction, as well  
14      as mechanistic interpretation of predictions.

15      **Keywords** CLIP-seq · Deep Learning · Computational Biology · Protein-RNA Interaction

---

\*To whom correspondence should be addressed

## 16 **1 Background**

17 RNA-binding proteins (RBPs) are a family of proteins that bind to coding and non-coding transcripts, usually through  
18 recognition of short sequence or structural features commonly known as motifs [8]. To date, over 2,000 proteins have  
19 been experimentally identified as RNA-binding, rendering it one of the largest cellular protein groups [13]. RBPs are  
20 involved in every aspect of post-transcriptional regulation, including modification, stabilization, localization, splicing  
21 and translation of RNAs [20]. Misregulation of RBPs, as well as mutations in their amino acid sequence or the sequence  
22 of their RNA targets, has been associated with an abundance of human diseases, including neurological and psychiatric  
23 disorders [42]. Therefore, uncovering binding preferences and RNA targets of RBPs is crucial for understanding the  
24 role of RBPs in post-transcriptional regulatory pathways and for quantifying the impact of their dis-regulation in context  
25 of human disease. Nowadays, the most common protein-centric experimental approach to profile RNA-binding *in vivo*  
26 is via individual-nucleotide resolution Cross-Linking and Immunoprecipitation followed by sequencing (CLIP-seq)  
27 [22, 54] and its derivatives, which enables transcriptome-wide detection of protein-RNA interactions for a protein of  
28 interest. Variants of CLIP-seq, including *individual-nucleotide* and *enhanced CLIP* (iCLIP and eCLIP, respectively),  
29 further allow for detection of protein-RNA crosslinking events at single-nucleotide resolution. Here, in brief, cells  
30 are radiated with UV light, forming covalent cross-links between RNA molecules and bound proteins. Protein/RNA  
31 complexes are then purified with protein-specific antibodies and the bound proteins are digested. Subsequently, the  
32 bound RNA molecules are reverse-transcribed to cDNA, followed by high-throughput sequencing. Reverse-transcription  
33 often truncates at the cross-linked site due to a small peptide remaining bound to the site after protein digestion. After  
34 alignment of reads to the reference genome, this leads to an accumulation of read-starts at one nucleotide down-stream  
35 of the cross-linked site. The resulting nucleotide-wise count signal can then be used to identify binding sites of the RBP  
36 of interest as RNA regions where the signal is significantly higher than expected, given some background model [49].  
37 CLIP-seq data is commonly post-processed with peak callers, which identify a number of regions of enriched signal  
38 (also referred to as *binding sites*), usually in the order of thousands. As peak calling is subject to unspecific cross-linking  
39 events in the underlying data, inferring target-specific signal from CLIP data is crucial. Multiple studies have identified  
40 a number of CLIP-associated biases, including background signal from abundant RNAs that are not properly washed  
41 during library preparation, library contamination with bound RNAs of other RBPs and strong UV crosslinking bias  
42 towards single-stranded uridine-rich motifs [16]. CLIP-seq experiments are often paired with a control, to account for  
43 unspecific background signal. For instance, the eCLIP protocol is designed to generate a size-matched input (SMInput)  
44 control by omitting the IP step such that the resulting library represents RNA fragments crosslinked to a mixture of  
45 background proteins with a similar molecular weight as the target RBP. Therefore, eCLIP SMInput data is a powerful  
46 resource to correct computational methods for experimental bias and reduce the number of detected unspecific binding  
47 events for an RBP of interest.

48 Analysis of experimentally identified RNA binding-sites can give insight into both the functional role of the RBP as well  
49 as the RNA sequence and structure feature by which it identifies (and binds to) its RNA targets. In addition, knowledge  
50 of the binding preference of an RBP enables imputation of protein-RNA interaction on RNAs not present at the time  
51 of the experiment. While traditional methods for *de novo* motif finding [3] or more sophisticated generative models  
52 [19] analyze identified RNA binding sites directly, for instance by aggregating enriched sub-sequences into motif  
53 position-weight matrices (PWMs), more recent model-based approaches [25, 37] attempt to model RBP-binding as a  
54 function of RNA sequence for a given protein of interest. That is, model-based approaches attempt to find a function of  
55 the form  $f : RNA \rightarrow \sigma(CLIP)$ , where  $\sigma$  is some post-processing function on the raw experimental CLIP, for instance  
56 a peak caller. Model-based analysis of RBP binding has several key advantages over traditional model-free approaches.  
57 First, the availability of a model allows for imputation of missing binding site information. As only a fraction of  
58 transcripts may be expressed in the experimental cell type at a given time, CLIP-seq experiments generally draw an  
59 incomplete picture of an RBP's binding landscape. Here, predictions from RBP binding models may aid researchers  
60 in generalizing their analysis to unobserved transcripts by providing candidate sites of protein-RNA interaction. The  
61 ability to impute missing binding information on arbitrary RNA sequences is especially relevant for the analysis of  
62 RBP-binding to foreign sequences, such as foreign RNAs derived from viruses [21]. Second, the model  $f$  represents a  
63 simplified abstraction of the *in vivo* biology, that is, the recognition of a binding site in a target RNA sequence by the  
64 protein of interest. Besides identifying drivers of RNA target recognition (e.g. binding motifs), the ability to study  $f$   
65 enables "what-if" analysis, allowing one to explore how changes in the RNA input sequence affect RBP binding. For  
66 instance, researchers may investigate the impact of single-nucleotide variants (SNVs) on RBP binding *in silico*.

67 Deep learning enabled ground-breaking performance on tasks across a broad domain of research, including the  
68 computational modeling of protein-RNA interaction [1, 14, 5, 41]. Current state-of-the-art RBP binding predictions  
69 models are generally classification-based, that is, given an input RNA sequence, the model is tasked with predicting  
70 whether the sequence is *bound* or *unbound* by the protein of interest. While classification-based models represent  
71 a significant improvement over traditional methods, they have several limitations. First, training and evaluation of  
72 classification-based models requires prior annotation of sequences with high-quality binary bound/unbound labels,

## TOWARDS IN-SILICO CLIP-SEQ: PREDICTING PROTEIN-RNA INTERACTION VIA SEQUENCE-TO-SIGNAL LEARNING

73 generally through the use of peaks callers, making the model heavily dependent on upstream preprocessing steps.  
74 Therefore, performance of classification-based models is highly sensitive towards the availability of unbiased bona  
75 fide binding sites. Second, predictions of classification-based models generally have low resolution. While methods  
76 commonly take as input RNA sequences of 100s of nucleotides in length, the predicted label is assigned to the entire  
77 input region. This create ambiguity with regards to the exact location of the protein-RNA interaction site, which usually  
78 spans only a few nucleotides. Third, binary labels (*bound* and *unbound*) modeled by classification-based methods  
79 represent a strong simplification of the information yielded by CLIP-seq experiment. Compression of the CLIP-seq  
80 signal footprint within transcript region to a binary value may lead to loss of essential information for understanding the  
81 nuances of protein-RNA interaction.

82 Recently, a new class of models has emerged, which directly predict experimental signal from genomic sequences [2, 27].  
83 For instance, BPNet [2] trains a dilated convolutional neural network which models transcription factor (TF) binding by  
84 predicting ChIP-nexus signal from DNA sequences at base resolution. However, there is a lack of sequence-to-signal  
85 models for prediction tasks on RNA sequences, including the task of modeling protein-RNA interaction via CLIP-seq  
86 signal prediction. In context of CLIP-seq, the presence of technical biases and cell-type specific RNA abundance pose a  
87 challenge with respect to the identification of sequence-mediated binding mechanisms at single-nucleotide resolution.  
88 Therefore, models need to account for the fact that the observed signal may partially be observed due to technical biases,  
89 rather than protein-RNA interaction of target RBP. This effect may further depend on the RNA sequence context, as is  
90 the case for nucleotide-specific crosslinking biases or sample contamination with other RBPs which themselves have  
91 certain sequence-depended binding preferences.

92 To fill this gap we developed RBPNet, a sequence-to-signal dilated convolutional neural network, which learns a direct  
93 mapping of RNA sequences to crosslink count signal extracted from CLIP-seq experiments. Given a variable-length  
94 RNA input sequence, RBPNet predicts the *distribution* of crosslink counts at single-nucleotide resolution along the  
95 input sequence, thereby enabling learning the binding profile of an RBP on a transcripts of arbitrary length. Existing  
96 sequence-based models of CLIP data are binary classifiers which necessitate important preprocessing steps, thus loosing  
97 the high resolution and the quantitative nature of the data. In contrast to current state-of-the-art classifiers, RBPNet does  
98 not require a peak caller to produce transcript regions as candidate sites for model training. Instead, it uses a lenient  
99 cutoff-based approach to train on all regions that show an enrichment of crosslink counts, thereby making maximal  
100 use of signal generated by the underlying experiment. By additionally modeling the background signal of a paired  
101 control experiment, RBPNet implicitly learns the bias and protein-specific crosslinking components of the total signal,  
102 allowing one to disentangle genuine signal from noise. By training on hundreds of thousands of regions per RBP  
103 CLIP experiment, RBPNet reaches high accuracy in predicting RBP binding signal shape on held-out test data across  
104 eCLIP, iCLIP and miCLIP experiments. Further, it allows for direct inference of predictions across variable-length  
105 sequences and whole transcripts, while outperforming state-of-the-art RBP binding classification models with respect to  
106 the identification of crosslink sites derived from PureCLIP [31], a single-nucleotide peak caller. By performing model  
107 interpretation with Integrated Gradients, we demonstrate the capability of RBPNet to accurately identify the sequence  
108 patterns driving RBP-RNA interactions and enable binding motif discovery. Lastly, we show the high potential of  
109 RBPNet in scoring the impact of single-nucleotide genetic variants on RBP binding, and thereby enable prioritization  
110 of functional variants.

## 111 2 Results

### 112 RBPNet predicts crosslink count distribution from RNA sequence

113 RBPNet is a deep convolutional sequence-to-signal neural network for modeling protein-RNA interaction profiles, which  
114 takes as input a RNA sequence and outputs a probability vector of the same length, describing a discrete distribution of  
115 counts within that sequence. In the context of eCLIP, iCLIP or other individual nucleotide CLIP technologies, RBPNet  
116 predicts the distribution of cDNA truncation events, as a result of protein-RNA crosslinking and hereafter also referred  
117 to as "crosslink counts", along an input RNA sequence. In this study, RBPNet was trained and evaluated on a large  
118 cohort of eCLIP, iCLIP and miCLIP datasets. An outline of the study is shown in Figure 1a, which gives a schematic  
119 overview of training data generation, model training and interrogation for investigating sequence determinants of RBP  
120 binding, including binding motif extraction.

121 The RBPNet model architecture consists of two major parts - the model body, comprised of the input layer followed by  
122 several convolutional blocks with residual connections, and the model head, which performs the final mapping of the  
123 input sequence representation, derived from the body model output, to a probability vector (Figure 1b). Importantly,  
124 while RBPNet is trained on fixed-length inputs, its purely convolutional architecture enables prediction on RNA  
125 sequences of arbitrary length. During training, the predicted probability vector is used to parameterize a multinomial  
126 distribution of crosslink counts and, given the position-wise observed counts in the input sequence interval, a negative  
127 log-likelihood loss is computed. In other words, the model is penalized in cases where it is unlikely that the observed  
128 crosslink counts were drawn from the distribution predicted by the model. RBPNet thus learns the shape of the  
129 crosslink count signal, which is subject to the RNA sequence under the assumption that RNA sequence composition  
130 is a driver of recognition (and subsequent binding) by RBPs. Similar to other CLIP-based protocols, eCLIP is  
131 known to be subject to experimental biases, for instance as a result of enhanced photoreactivity of single-stranded  
132 uridine (U) nucleotides during UV-radiation or contamination of eCLIP libraries with other RBPs [15]. Importantly,  
133 these biases are sequence-dependent and directly affect the distribution of cDNA truncation counts, hindering the  
134 identification of genuine sequence determinants of RBP binding. For that reason, eCLIP experiments are paired with  
135 a size-match input (SMInput) control experiment which omits the protein-specific immunoprecipitation (IP) step,  
136 therefore capturing background crosslinking signal from other RBPs or technical biases. To prevent pattern learning  
137 of unspecific background and bias signal, RBPNet models the crosslink signal of the control experiment alongside  
138 the eCLIP signal. Specifically, RBPNet attempts to explain the observed eCLIP signal as a mixture of two signal  
139 components - the *control* component, which is explicitly learned from the control experiment, and an unobserved *target*  
140 component, which represents the protein-specific signal (Methods 5.6). The *total* signal, that is, the count distribution of  
141 the eCLIP experiment, is then given by a weighted sum of the two components. This is illustrated schematically in the  
142 RBPNet output head in Figure 1b as well as in Supplementary Figure 1a, which outlines the network forward pass in the  
143 output head. The mixture of the two signals (target and control) is parameterized by a coefficient  $\pi$ , which is predicted  
144 from the RNA sequence and ranges between 0 and 1. Importantly, we control for technical bias in CLIP assays which  
145 we modeled with an additive mixture. This is in contrast to BPNNet, a model for chromatin-immunoprecipitation assays  
146 which is dominated by DNA accessibility and sequence preference biases that were modeled as multiplicative noise [2].

### 147 RBPNet disentangles bias and protein-specific signal

148 The formulation of the *total* eCLIP signal as an additive mixture allows for disentanglement of the *target* from the  
149 *control* signal, where the predicted *target* signal represents in theory the bias-free, protein-specific crosslinking signal.  
150 This is exemplified in Figure 1c, which shows the observed eCLIP and SMInput read start counts (top), as well as  
151 the *total*, *target* and *control* signal predictions (bottom) using an RBPNet model trained on eCLIP data from the QKI  
152 RBP. The RBPNet *total track* (blue) captures well the experimental eCLIP read-start count profile, where the highest  
153 enrichment of eCLIP counts can be observed at position 113 of the sequence, immediately upstream of the known  
154 QKI binding motif (U)ACUUA [6]. Disentangling the predicted signal with RBPNet shows that the enrichment at  
155 this position is mostly attributed to the target, i.e. the true QKI-specific binding signal (green). On the other hand, the  
156 experimental eCLIP profile harbors two regions with lower enrichment of read start count around relative positions 102  
157 and 189. Disentangling of the RBPNet total signal reveals that the count enrichment in these regions likely originated  
158 from experimental bias, as these regions coincide with elevated signal predictions of the control track (red). Further  
159 investigation of RBPNet predictions via Integrated Gradients (IG) [50] feature importance scores with respect to each  
160 signal track revealed that the known QKI binding motif (U)ACUUA [6] is correctly recovered in the IG map of the target  
161 track, corroborating the evidence that the predicted target signal shape corresponds to the bona fide QKI binding signal.  
162 In contrast, no clear<sup>2</sup> QKI motif is observed in the IG maps of the control track, while the recovery of U-rich sequence

<sup>2</sup>Note that the QKI-specific signal is partially captured in the bias track. While the SMInput experiment omits the immunoprecipitation, subsequent size-selection for the target protein still leads to a modest enrichment of protein-specific crosslink signal

## TOWARDS IN-SILICO CLIP-SEQ: PREDICTING PROTEIN-RNA INTERACTION VIA SEQUENCE-TO-SIGNAL LEARNING

163 motifs at the modes of the predicted control track distribution further strengthen the observation that those regions  
164 correspond to experimental bias. While the predicted *total* track is a weighted average of *target* and *control* signal (with  
165 a mixing coefficient of 0.92, such that the target is dominating over the control track), genuine QKI binding signal is  
166 correctly recovered by the predicted *target* track. Likewise, signal enrichment mainly representing experimental bias  
167 are recovered by the *control* track, while being present in very low proportions in the *target* signal.

### 168 **RBPNet predicts eCLIP signal shape at replicate-level accuracy**

169 We next performed evaluation on 103 RBPNet models trained on data from ENCODE [53] eCLIP experiments. To  
170 this end, for each eCLIP experiment, candidate training pairs of 300nt long sequences and crosslink count footprints  
171 were first generated without the use of a peak caller via lenient signal-thresholding (Methods) and subsequently split  
172 chromosome-wise into train, validation and test sets (Methods). Overall, we obtained an average of 302, 752 candidate  
173 sites across eCLIP datasets, with a minimum of 7, 937 sites for LARP7 and a maximum number of 1, 105, 807 sites  
174 for HNRNPC. Subsequently, RBPNet models were trained separately for each RBP for at most 50 epochs, while the  
175 validation loss was observed for the purpose of early-stopping (Methods). Example predictions on hold-out samples  
176 with highest total observed counts for TIA1, QKI and U2AF2 are depicted in Figure 2a. Predictions show a high  
177 Pearson correlation coefficient (PCC) with the observed eCLIP counts (0.763, 0.830 and 0.872 for TIA1, QKI and  
178 U2AF2, respectively), demonstrating that RBPNet can recapitulate the eCLIP signal shape at high accuracy. Next, we  
179 quantitatively assessed correlation of predicted and observed signal distribution. Figure 2b shows the average PCC of  
180 RBPNet (total track) predictions with observed eCLIP counts on hold-out samples versus the average PCC of counts  
181 between the two eCLIP replicates on the same sequence intervals. RBPNet achieves an average PCC between 0.200  
182 (SSB) and 0.587 (HNRNPC), with an average PCC of 0.328. Strikingly, RBPNet prediction appear to outperform  
183 replicates, which have an average PCC of 0.149 across all RBPs. The reason for this are two-fold. First, correlation  
184 between RBPNet predictions and observed counts are computed with respect to the merged count of both replicates,  
185 which reduces sampling effects and thus may increase PCC. Second, RBPNet predicts the count-generating distribution  
186 in the given interval, conditioned on the RNA sequence. In contrast, the observations in each replicate represent samples  
187 from the true (but unknown) count-generating distribution. As the estimated signal distribution by RBPNet approaches  
188 true distribution, the expected PCC between RBPNet predictions and a sample exceeds the expected PCC between the  
189 two samples (Supplementary Text).

### 190 **RBPNet enables whole-transcript inference and recovers single-nucleotide resolution binding sites**

191 We next leveraged RBPNet's ability of performing prediction of RNA sequences of arbitrary length, despite being  
192 trained on fixed-length inputs. We explored first whether RBPNet can infer signal on entire transcripts by first  
193 selecting genes from GENECODE (Release 40) [10] from hold-out chromosomes and subsequently performing  
194 RBPNet predictions using models for all ENCODE RBPs. Figure 2f and 2g shows RBPNet predictions (total track) on  
195 ENSG00000173207.12 and ENSG00000137955.15 for QKI and HNRNPC, respectively. Indeed, RBPNet predictions  
196 show a high correlation with the observed eCLIP counts (0.645 and 0.816, respectively), demonstrating that RBPNet  
197 models trained on rather short, fixed-size inputs generalize well to the task of whole-transcript prediction.

198 Given that RBPNet predictions show high correlation with observed eCLIP counts, we next assessed whether high-  
199 scoring RBPNet predictions coincide with peaks called by PureCLIP [31], a single-nucleotide peak caller that identifies  
200 significant crosslink sites from eCLIP and SMInput cDNA truncation counts using a Hidden Markov Model. To this end,  
201 we performed whole-genome peak calling with PureCLIP on ENCODE eCLIP datasets (Methods 5.10.2), identifying on  
202 average 46, 459 crosslink (CL) sites per RBP, with a minimum and maximum number of CL sites of 1, 083 and 585, 772  
203 for NIP7 and HNRNPC, respectively. For each RBP, hold-out chromosome genes were intersected with PureCLIP  
204 CL sites and transcripts harboring at least 10 CL sites were selected for downstream evaluation. Subsequently, whole-  
205 transcript signal shape prediction was performed via RBPNet on selected transcripts. Here, predictions of the *target* track  
206 were used as PureCLIP peaks were called using both eCLIP and SMInput background signal information (Methods).  
207 For each transcript, auROC and average precision (AP) performance metrics were computed by treating positions at  
208 PureCLIP CL sites as positives and all other positions as negatives (Supplementary Table 1). Since RBPNet predicts the  
209 distribution of crosslink sites along genes, the probability at each position correlates with the genes length as well as  
210 the abundance of RBP binding on the transcript, rendering position-wise RBPNet predictions uncomparable across  
211 transcripts. Therefore, auROC and AP metrics are computed within transcripts and later averaged across transcripts  
212 in order to report the final, RBP-specific auROC and AP scores. In order to assess how the RBPNet behaves with  
213 respect to classification-based models, we next compared RBPNet predictions to DeepRiPe, a state-of-the-art classifier  
214 for prediction of protein-RNA interaction, by using a sliding-window approach to obtain pseudo single-nucleotide  
215 resolution scores (Methods). Since pre-trained DeepRiPe models for HepG2 ENCODE datasets were obtained directly  
216 from Ghanbari et al. [14], sequences in our hold-out set may have been present during training of DeepRiPe.

## TOWARDS IN-SILICO CLIP-SEQ: PREDICTING PROTEIN-RNA INTERACTION VIA SEQUENCE-TO-SIGNAL LEARNING

217 Figure 2c and 2d show the average auROC and AP scores, respectively. RBPNet outperforms DeepRiPe on all RBPs  
218 in terms of auROC performance, with an average auROC of 0.89 and a minimum and maximum auROC of 0.58 and  
219 0.98 for SSB and HNRNPk, respectively. In contrast, DeepRiPe achieves a significantly lower average auROC of  
220 0.74. Interestingly, RBP-wise auROC scores of RBPNet and DeepRiPe are strongly correlated ( $PCC = 0.72$ ). This may  
221 suggest that some ENCODE eCLIP libraries are of lower quality or that RNA binding of some RBPs is more difficult to  
222 predict from sequence, possibly due to a lack of sequence binding motifs. Notably, RBPNet shows a lower variance of  
223 auROC performance across RBPs. Given that classification-based models such as DeepRiPe rely heavily on proper  
224 categorization of RNA sequences into binding and non-binding for training, this may indicate a higher robustness of  
225 RBPNet due to its training approach, which does not rely on upstream peak calling or labeling of RNA sequences. Both  
226 RBPNet and DeepRiPe AP values across RBPs range between 0.00032 and 0.2518 and .00038 and 0.0774, respectively,  
227 with RBPNet significantly outperforming DeepRiPe (average AP of 0.086 vs. 0.012, respectively). The generally  
228 low AP values of both methods is due to AP being sensitive to class imbalance, with the random AP baseline being  
229 equivalent to the fraction of positive samples in the dataset. Here, hold-out transcripts have an average PureCLIP CL  
230 site fraction of 0.0014 across RBPs, given that transcripts are expected to harbor orders of magnitude more non-CL  
231 than CL sites. Thus, while having low AP, RBPNet and DeepRiPe outperform the random baseline by a large margin.  
232 Overall, these results show that RBPNet is a powerful discriminator of PureCLIP CL and non-CL positions across the  
233 transcriptome, outperforming state-of-the-art classifiers.

### 234 RBPNet mixing coefficient captures relative eCLIP and SMInput signal abundance

235 RBPNet models the *total* eCLIP signal as a mixture of protein-specific *target* and *control* signal, weighted by a mixing  
236 coefficient which determines the fraction of *target* signal in the *total* signal (Methods). In order to evaluate whether  
237 the mixing coefficient captures the fraction of target and control signals properly, we inspected mixing coefficients of  
238 high- and low-affinity ENCODE narrow peaks [54]. To this end, for each RBP, we obtained ENCODE narrow peaks and  
239 ordered them decreasingly with respect to their  $\log_2$  fold-change ( $\log_2FC$ ) of eCLIP signal over the SMInput. Peaks in  
240 the top and bottom deciles were then selected and extended up- and down-stream from their 5' end, which generally  
241 corresponds to the crosslink site, to yield 300nt windows. Finally, RBPNet predictions were performed for each window  
242 and mixing coefficients were obtained. Figure 2e shows the distribution of mixing coefficients on top and bottom decile  
243 ENCODE narrow peaks. Indeed, top decile peaks receive on average significantly higher mixing coefficients compared  
244 to bottom decile peaks ( $p < 2.2 \times 10^{-16}$ ), suggesting that the RBPNet mixing coefficient can separate high-affinity  
245 from low-affinity sites, where the latter contains a higher proportion of background signal.

### 246 RBPNet generalizes to iCLIP and miCLIP experiments

247 RBPNet may be trained on any genomic sequence with a corresponding nucleotide-wise count signal. To demonstrate  
248 that RBPNet generalizes to other CLIP-based protocols, we trained RBPNet on data derived from miCLIP and iCLIP  
249 experiments.

250 miCLIP enables *in vivo* identification of m6a RNA modifications at single-nucleotide resolution by incubating and  
251 subsequently crosslinking extracted RNA with a m6a-specific antibody [36]. After digestion of the covalently bound  
252 antibody, reverse transcription often truncates at a remaining polypeptide at the crosslink site, with pileups of truncation  
253 events yielding an m6a count signal across the transcriptome. miCLIP data from HEK293 and mESC cells was gathered  
254 from Kortel et al. [30] and processed similar to eCLIP data (Methods), before selecting candidate sites for training  
255 and evaluation (Methods). Subsequently, RBPNet models were trained on both cell lines using a similar architecture  
256 and hyperparameters as in eCLIP RBPNet models (Methods). While the mESC miCLIP experiment was paired with a  
257 knockout (KO) control experiment, no control experiment was available for HEK293. We therefore trained RBPNet  
258 on HEK293 miCLIP data without *target* and *control* modeling, that is, RBPNet was tasked to predict a single track  
259 describing the distribution of *total* miCLIP counts in the HEK293 cell line. RBPNet (total track) showed high signal  
260 correlation on miCLIP counts in both cell lines (Figure 3a), reaching PCCs of 0.51 and 0.48 for HEK293 and mESC,  
261 respectively. To evaluate the ability of RBPNet to recover miCLIP single-nucleotide peaks, we again performed  
262 peak calling with PureCLIP (Methods), yielding a total of 2,011,704 and 278,311 for HEK293 and mESC miCLIP,  
263 respectively. We hypothesize that the significantly higher number of PureCLIP CL sites in HEK293 may be due to a  
264 lack of control signal, which in context of mESC may lead to a large number of candidate CL sites being discarded.  
265 While the KO control is used for PureCLIP background normalization for the mESC cell line, no control is used for peak  
266 calling on the HEK293 cell line, as this was not available. Due to the lack of controls, PureCLIP yields a significantly  
267 higher number of CL sites in HEK293 compared to mESC, where a high portion of them may correspond to false  
268 positives or noise. Similar to PureCLIP analysis in eCLIP, we then performed whole-transcript inference of miCLIP  
269 signal shape on genes of the hold-out set. Figure 3b and 3c show the ROC curves for HEK293 and mESC, respectively.  
270 RBPNet performs well in terms of auROC on both cell lines, with an average auROC of 0.89 for HEK293 and 0.88 for  
271 the mESC cell line. In contrast, RBPNet achieves an AP scores of 0.1 and 0.043 for HEK293 and mESC, respectively,

## TOWARDS IN-SILICO CLIP-SEQ: PREDICTING PROTEIN-RNA INTERACTION VIA SEQUENCE-TO-SIGNAL LEARNING

272 with AP performance naturally increasing together with the fraction of positions harboring PureCLIP CL sites. This is  
273 illustrated in Figure 3d, which shows the distribution of AP scores across transcripts grouped into quartiles based on  
274 their CL fraction. We consequently observe a lower AP score for mESC compared to the HEK293 cell line as a result of  
275 the lower number of PureCLIP CL sites in mESC. Figure 3e and 3e shows example RBPNet predictions (total track) on  
276 two human genes (ENSG00000142937.11 and ENSG00000161016.15, respectively) from the hold-out chromosomes  
277 using the HEK293 RBPNet model. Interestingly, RBPNet predictions (as well as observed signal) predominantly occur  
278 in coding regions (CDS) and 5'/3' untranslated regions (UTRs), while being only slightly present in introns, which is in  
279 line with previous study reporting that  $m^6A$  methylation mainly those genomic regions [26, 38].

280 We next evaluated the performance of RBPNet on individual-nucleotide CLIP (iCLIP) data [29]. Compared to eCLIP, it  
281 makes use of extra circularization and linearization steps, which allow all cross-linked cDNA fragments to be amplified  
282 and sequenced, and a quality control step to assess specificity of pulled-down protein-RNA complexes. To this end, we  
283 gathered iCLIP data from Hallegger et al. [18] and Haberman et al. [15] for TDP43 and PTBP1 proteins, respectively,  
284 which was processed as described in Section 5.1. As no paired control experiment was available for either RBP, we  
285 again trained RBPNet by omitting modeling of *target* and *control* signal and instead tasked RBPNet with predicting the  
286 total iCLIP count distribution directly. Figure 3g shows the distribution of PCCs on test set samples for the PTBP1 and  
287 TDP43 models. RBPNet reaches an average PCC of 0.46 for TDP43 and 0.320 for PTBP1. Notably, RBPNet reaches a  
288 comparable PCC of 0.366 on the PTBP1 eCLIP dataset, which may suggest that the fraction of PTBP1 signal (and thus  
289 RNA-binding) explained by RNA sequence is comparable in the eCLIP and iCLIP datasets. This demonstrates the  
290 capability of RBPNet to achieve high predictive performance of the RBP-RNA interaction signal shape, independently  
291 of the protocol used to generate the data the model is trained on. In order to qualitatively assess the ability of the  
292 RBPNet-TDP-43 model to predict signal shapes on full length transcript when trained on iCLIP data, we manually  
293 investigated the prediction profile on the hold-out transcript with the highest absolute counts. Figure 3h shows TDP-43  
294 RBPNet predictions and observed iCLIP counts for ENSG00000278249.1 (SCARNA2), a scaRNA associated with  
295 DNA repair pathway regulation that has been previously described to be interacting with TDP43 [23, 4]. Indeed, the  
296 profile predicted by RBPNet strikingly reflects the observed signal.

### 297 Sequence attribution maps capture RBP binding motifs

298 Recognition of target RNAs by RBPs is in part driven by local sequence features, also known as binding motifs.  
299 The identification of RBP binding motifs is crucial for understanding RBP target recognition and the regulatory  
300 grammar present in RNA sequences. While deep learning models were long regarded as black boxes, recent feature  
301 attribution methods, such as Integrated Gradients (IG) [50], allow for the identification of input features that contributed  
302 significantly to the observed model prediction. In the context of RBPNet, these methods "attribute" a given prediction  
303 to nucleotides in the input RNA sequence by assigning a score to each position. Nucleotides that were primarily  
304 responsible for the observed crosslink count distribution, such as those residing in binding motifs, receive a higher  
305 score compared to nucleotides that did not contribute towards protein-RNA crosslinking. IG attribution maps may be  
306 computed with respect to any of the three output track, i.e. control, target and total. Attributions of the target track are  
307 expected to highlight nucleotides that contributed significantly towards protein-specific crosslinking, while attribution  
308 of the control track are expected to explain the unspecific background and bias signals<sup>3</sup>.

309 Figure 4a shows examples of IG attribution maps, computed with respect to *control* and *target* tracks for test-set samples  
310 using eCLIP RBPNet models for RBFOX2, HNRNPK, TIA1 and QKI, alongside PWMs of consensus motifs reported  
311 in literature, obtained from the RBPmap database [43]. The corresponding predicted *control* and *target* signals are  
312 shown above the attribution maps (in red and green, respectively). Target track IG attribution maps show the presence  
313 of highly predictive sub-sequences that correspond to known binding motifs for each of the shown RBPs. For instance,  
314 IGs of HNRNPK show the characteristic U-motif, while three distinct canonical ACUAAC motifs can be seen in the  
315 IGs of QKI. In contrast, control track attribution maps do not show the presence of clear binding motifs, with a general  
316 attribution score enrichment at G and C nucleotides. We next performed a global quantitative assessment of how well  
317 RBPNet attribution maps can recover known binding motifs across RBPs in the ENCODE eCLIP database. To this end,  
318 we selected the top 5,000 ENCODE narrow peaks for all ENCODE eCLIP experiments with trained RBPNet models  
319 and computed IG attribution maps with respect to *target*, *control* and *total* tracks for each RBP. For each attribution map,  
320 we extracted 5-mers with highest sum IG scores (Methods). Extracted 5mers were then compared with position-weight  
321 matrices (PWMs) of literature motifs obtained from the RBPmap [43] database by computing the similarity between  
322 each 5mer and its corresponding RBPmap motif (Methods). In total, 29 out of the 103 ENCODE RBPs with RBPNet  
323 models were represented with at least one PWM in RBPmap, which were then selected for downstream analysis. Figure  
324 4b shows the distribution of average similarity scores of extracted 5mers to RBPmap PWMs across RBPs for each

<sup>3</sup>Note that not all technical CLIP bias is manifested in the RNA sequence and thus learnable by the RBPNet model. Therefore, only the sequence-component of the bias will be captured in control track IG maps.

## TOWARDS IN-SILICO CLIP-SEQ: PREDICTING PROTEIN-RNA INTERACTION VIA SEQUENCE-TO-SIGNAL LEARNING

of the three RBPNet prediction tracks. 5-mers extracted from attribution maps of the *target* track show the highest RBPmap-similarity, consistent with the fact that this track represents the de-biased, protein-specific signal predictions, followed by the *total* and *control* tracks, respectively. Notably, on average 5-mers extracted with respect to the control track have the lowest similarity to known RBP PWMs, highlighting the ability of RBPNet to extract different sequence representation for true signal and bias, respectively. To investigate the degree of improvement that signal de-biasing in the *target* track offers over the *total* track for individual RBPs, Figure 4c shows the average *target* and *total* track RBPmap-similarity for each RBP. Interestingly, we find that while for some RBPs, the *target* track leads to no or only modest improvements of RBPmap-similarity compared to the *total* track, other RBPs, such as HNRNPC, PCBP2, RBFOX2 and TRA2A, appear to benefit strongly from the signal de-biasing of the *target* track. This may reflect variable levels of experimental bias across eCLIP datasets.

### RBPNet IG attribution maps recover *in vitro* binding motifs

*In vitro* experiments on protein-RNA interactions, such as RNA-Bind-N-Seq and RNAcompete, offer an orthogonal view to validate motifs identified from *in vivo* data, as they do not harbor crosslinking specific biases or contamination of experiments with other RBPs and therefore measure intrinsic affinity of RBPs to RNA in an unperturbed environment [34, 45]. To examine whether modelling of the control signal as an auxiliary task can increase the specificity of predicted CLIP signal, we cross compared 5-mers previously obtained from RBPNet IG attribution maps of *target*, *control* and *total* tracks with 5-mers enriched in corresponding RNA-Bind-N-Seq (RBNS) or RNAcompete *in vitro* datasets. In total, we evaluated 27 eCLIP datasets in the HepG2 cell line, for which either RBNS (16 RBPs) or RNAcompete (11 RBPs) data was also available.

To measure the agreement between *in vitro* 5-mers and RBPNet 5-mers obtained in the previous section, we first computed the sum of  $IG_{sum}$  scores for each unique 5-mer as a measure of importance with respect to CLIP signal shape prediction. We then calculated the RBPNet recall for each track by taking the fraction of the top 20 *in vitro* 5-mers that were recovered in the top 20 5-mers by RBPNet on eCLIP datasets (Methods). We found that across evaluated RBPs, the RBPNet *target* track recovered a significantly higher proportion of relevant *in vitro* 5-mers from eCLIP than the *total* track, suggesting that RBPNet can successfully increase the specificity of eCLIP signal (Figure 4d). As expected, the *control* track recovered the least *in vitro* k-mers, however, for some RBPs even the *control* track alone could retrieve high ranking *in vitro* motifs. This effect could be explained by a partial enrichment of RBP-specific signal in the control experiment, as suggested by a previous study, which evaluated the effect of using eCLIP narrow peaks in contrast to SMInput-agnostic peak-calling on discovery of relevant binding motifs from eCLIP data [32]. Next, we set out to assess whether the governing sequence features learned by RBPNet could be reliably used for motif discovery. To this end, we compared the RBPNet recall to positionally-enriched k-mer analysis (PEKA), a state-of-the art tool for discovery of enriched k-mers from individual CLIP datasets [32] and DeepRiPe. In contrast to RBPNet, PEKA models background from intrinsic crosslinking signal and does not use SMInput controls, therefore it provides valuable orthogonal view in how specificity of the motifs can be impacted by different background modelling approaches. Surprisingly, we found that the RBPNet *target* track recovered a similar proportion of relevant *in vitro* k-mers compared to PEKA, despite the fact that RBPNet was not originally designed for objective of motif discovery (Figure 4d). Lastly, we investigated whether a direct modeling of eCLIP signal, compared to binary labels (bound / unbound) assigned to entire RNA sequences, offers an advantage in the context of motif discovery. To this end, we compared RBPNet recall performance to DeepRiPe by extracting 5-mers from DeepRiPe attribution maps (Methods). Indeed, both RBPNet *target* and *total* track outperform DeepRiPe in terms of *in vitro* k-mer recovery (mean recall of 0.294, 0.254 and 0.222, respectively), suggesting that direct modeling of raw eCLIP signal improves binding motif discovery irrespectively of bias modeling. Further, these results indicate that enriched *in vitro* k-mers are strong predictors of true CLIP signal and that RBPNet learns to associate the presence of these k-mers with high count signal. Lower agreement of the RBPNet *total* track (compared to *target* track) with *in vitro* k-mers suggests that a fraction of the *total* track signal is explained by sequence features not present in *in vitro* k-mers, which likely correspond various possible technical sources of sequence biases or contaminant signals in CLIP [16, 32].

### Consensus motifs reveal primary and secondary motifs

Having demonstrated that RBPNet successfully identifies predictive k-mers that coincide with *in vitro* datasets, we next constructed consensus binding motifs to concisely represent the sequence binding preference of each eCLIP RBP. To this end, we select 5-mers previously derived from RBPNet *target* track attribution maps and build consensus motifs by successively aligning 5-mers in the order of highest to lowest IG importance (Methods). Figure 4e shows consensus motifs together with the fraction of supporting 5mers for selected RBPs. Primary binding motifs identified with RBPNet agree with previously identified motifs reported in RBPmap (RBFOX2, QKI, TIA1, U2AF2, HNRNPC). Additionally, we identified novel candidate motifs for several RBPs, including AQR and CSTF2, for which no motifs exist in the RBPmap database. We further identify secondary consensus motifs, which may represent alternative binding



## TOWARDS IN-SILICO CLIP-SEQ: PREDICTING PROTEIN-RNA INTERACTION VIA SEQUENCE-TO-SIGNAL LEARNING

380 preferences or co-factor binding (Methods). Several RBPs, including RBFOX2, TIA1 and (to a lesser extend) HNRNPK,  
381 show a G-rich secondary motif (Figure 4e). We hypothesize that this may be due to co-factor binding of an RBP with  
382 G-motif preference or, as suggested by previous studies, may indicate contamination of eCLIP libraries with another  
383 RBP [32, 53]. A complete list of consensus motifs derived from RBPNet are shown in Supplementary Figure 2.

### 384 Studying the impact of sequence variants on protein-RNA interaction with RBPNet

385 RBPs are highly evolutionary conserved and have been associated with an abundance of human diseases, particularly in  
386 the context of degenerative disorders [42, 7]. Recently, Gebauer et al. [13] found that over 1,000 RBPs are mutated in  
387 context of disease, which amounts to >20% of proteins annotated with disease-associated mutations. Besides altered  
388 coding sequences of RBPs, nucleotide polymorphisms in their RNA targets may impact transcript regulation via loss  
389 of binding sites. Indeed, Park et al. [42] showed that dysregulation of RNA target sites from RBPs with a diverse set  
390 of functions represents a key driver of psychiatric disorder risk. Therefore, computationally quantifying the impact  
391 of variants with respect to protein-RNA interaction at large scale is crucial for the prioritization of causal variants  
392 in context of disease. Here, we use RBPNet to score the impact of sequence variants on protein-RNA interaction  
393 and demonstrate that resulting impact scores yield candidate variant that may be associated with the disruption of  
394 protein-RNA interaction.

395 Figure 5a exemplifies our variant scoring approach on *rs6981405*, an A-to-C transversion within the *DDHD2* gene that  
396 disrupts QKI binding and which has been associated with schizophrenic risk [42]. As shown, *in silico* mutagenesis  
397 leads to change in predicted RBPNet target signal around the variant, with a lower signal amplitude in the alternative  
398 (ALT) allele compared to the reference (REF), which we quantify as the Kullback–Leibler (KL) divergence between  
399 REF and ALT predictions (Methods), yielding a scalar KLD impact score. Feature attribution maps (Figure 5a, bottom)  
400 of the REF and ALT predictions reveal that *rs6981405* disrupts the well known QKI binding motif ACUAAC [17].  
401 The strongly negative implications of the A-to-C transversion at the last position of the binding motif is correctly  
402 detected by RBPNet, as is evident from the change of high-positive to high-negative attribution at the mutation site.  
403 To evaluate whether RBPNet assigns greater impact to SNPs within the QKI motif compared to SNPs outside the  
404 motif, we performed a systematic *in silico* perturbation analysis of each nucleotides within a 200nt window around the  
405 *rs6981405* SNP. Figure 5b depicts the distribution of a total of 600 variant impact scores, grouped based on whether  
406 they reside within or outside the QKI binding motif. Indeed, the majority of non-motif perturbations lead to small  
407 changes in predicted signal profile and thus to small impact scores, while mutations falling within the QKI motifs lead  
408 to significantly larger impact scores. This demonstrates that RBPNet can successfully quantify variant impact through  
409 the change of its predicted signal between REF and ALT alleles.

### 410 Investigating allele-specific binding (ASB) with RBPNet

411 To further probe RBPNet's ability to predict trustworthy variant impacts on protein-RNA interactions, we manually  
412 investigated experimentally identified allele specific binding events report by Yang et al. [58]. Figure 5c and 5d show  
413 the variant impact RBPNet profile for SNVs with the lowest associated p-value assigned by Yang et al. for AQR and  
414 RBFOX2, respectively. SNVs for both AQR and RBFOX2 are associated with drastic changes in their binding profiles,  
415 compared to the references sequences. The sequence around the SNV associated with the most significant binding event  
416 of RBFOX2 contains two binding motifs within a 100bp window. When predicting on the reference allele, RBPNet  
417 distributes the signal mass equally across the two motifs (5d). As the SNV hits one of the binding motifs, RBPNet  
418 in turn predicts a complete flattening of the predicted signal at that motif and a redistribution of the mass to the other  
419 motif. This allele-specific effect is clearly displayed both in the predicted profiles and in the attribution maps.

420 A limitation of Yang et al.'s [58] approach for identifying ASB events is the ambiguity in regards to which of two  
421 or more neighboring SNVs is causal for the observed gain or loss of protein-RNA interaction. This is exemplified  
422 in Figure ??, which shows 4 ASB events of QKI within a 200nt interval. As ASB events in [58] are defined based  
423 on differential read counts of the REF and ALT allele, reads spanning two or more co-occurring SNVs are counted  
424 towards all SNVs, thus leading to "passenger" SNVs that may not be associated with gain or disruption of protein-RNA  
425 interactions. Indeed, a separate investigation of impact profiles of each SNVs (Figure ??) revealed that only 2 (top left /  
426 top right) out of 4 SNVs are associated with a substantial change in predicted signal. Interestingly, both SNVs occur in  
427 one of the QKI binding motifs visible in the reference attribution maps (Figure ??). The two remaining SNVs (bottom  
428 left / bottom right) fall outside a QKI binding motif and thus show only a negligible change of predicted RBPNet signal.  
429 KLD impact scores for SNVs impacting QKI motifs are considerably higher (0.28 and 0.12) compared to SNVs outside  
430 of motifs (0.05 and 0.02), which is in line with the strong dependence of allele specific effects of SNVs with respect to  
431 their distance to known motifs [58]. Together, these results suggest that variant impact analysis via RBPNet can aid in  
432 prioritizing causal SNVs for allele specific binding.

## TOWARDS IN-SILICO CLIP-SEQ: PREDICTING PROTEIN-RNA INTERACTION VIA SEQUENCE-TO-SIGNAL LEARNING

### 433 **RBPNet discriminates between functional and non-functional mutations nearby splice junction**

434 Splicing is a complex and tightly regulated post-transcriptional processes in higher eukaryotes that requires concerted  
435 binding of multiple RBPs via spliceosomal complexes, with sequence variants disrupting regulatory binding motifs  
436 being associated with severe deleterious effects [11]. To evaluate RBPNet's ability to score the impact of sequence  
437 variants on RNA-binding of splicing factors, we obtained a set of 232 splicing-associated mutations from MutSpliceDB  
438 [40]. Indeed, we observed greater impact scores for splicing mutations compared to their local controls for 22 out of  
439 40 splicing-related RBPs (Supplementary Figure 3a, Methods 5.12.1). Notably, the set of significant RBPs showed  
440 an over-representation of spliceosomal RBPs (15 out of 22), concordant with their higher susceptibility to be directly  
441 impacted by splicing mutations at splice junctions. Applying the same procedure with DeepRiPe models, only 4 models  
442 (out of 30) showed a significant difference in impact scores allowing discrimination between splicing mutations and  
443 local negative controls. This is illustrated by the distribution of scores at various relative distance from splicing junctions,  
444 as seen for example with the pre-mRNA processing factor 8 (PRPF8, Supplementary Figure 3b), a core protein of  
445 the spliceosome. While the DeepRiPe model showed the most significant discrimination between functional and  
446 non-functional mutations (adjusted P-value =  $2.23 \times 10^{-3}$ ), we can see that the score distribution from non-functional  
447 mutations at very short distance (<10nt) is slightly more elevated than for mutations beyond. On the other hand, the  
448 RBPNet models shows a very clear discrimination even at such short distance. We confirmed the improvement of  
449 RBPNet over DeepRiPe for scoring variants by comparing the area under the Receiver Operating Curves from each pair  
450 of models (Supplementary Figure 3c), showing that RBPNet was a better classifier for 26 of the 30 models in common.

### 451 **Leveraging RBPNet to infer human RBP binding on viral RNAs**

452 We lastly evaluate RBPNet's ability to infer missing eCLIP signal shape on foreign RNAs. Viruses, including SARS-  
453 CoV-2, extensively interact with the host's RBPome [39, 12, 9]. As the large-scale experimental identification of human  
454 RBP binding on viral RNA is associated with significant monetary and labor costs, computational imputation of binding  
455 sites represents an attractive alternative to identify crucial host factors involved in the virus life cycle. Recently, Labeau  
456 et al. [33] experimentally identified binding of QKI to SARS-CoV-2 and reported that QKI-knockout cells are less  
457 permissive than wild-type cells.

458 Here, we utilize RBPNet models trained on eCLIP datasets to predicting binding profiles of human RBPs to SARS-  
459 CoV-2 at single nucleotide resolution. Figure 6b shows RBPNet target track predictions for QKI, showing several  
460 high-scoring regions across the SARS-CoV-2 sequence. IG attribution maps at sequence windows around the top 5  
461 highest prediction scores revealed the presence of the QKI binding motif, suggesting that the RBPNet-QKI model  
462 predicts bona fide binding profiles. To further validate that RBPNet predictions on SARS-CoV-2, we obtained eCLIP  
463 data for CNBP from Schmidt et al. [47]. Indeed, RBPNet target track predictions correlate significantly with the  
464 control-normalized eCLIP signal (Figure 6a), with an PCC of 0.210. Together, this indicates that RBPNet trained on  
465 human eCLIP experiments may be used to extrapolate eCLIP signal shapes to non-human RNA sequences.

### 466 **RBPNet Webserver**

467 For ease of use, a *BioLib* webserver version of RBPNet is accessible at <https://biolib.com/mhorlacher/RBPNet>,  
468 enabling prediction of signal profiles and sequence attribution maps with pre-trained models used in this study on  
469 user-provided RNA sequences.

### 470 3 Discussion

471 While high-throughput single-nucleotide CLIP-seq methods offer unprecedented insights into the protein-RNA inter-  
472 action landscape of RNA-binding proteins, they are limited to transcripts expressed in the experimental cell type at  
473 the time of the experiment. Therefore, researchers must rely on computational methods to impute missing binding  
474 information on unexpressed transcripts and or foreign RNAs from sequence. In recent years, an abundance of machine  
475 learning methods have been developed for the prediction of protein-RNA interaction from RNA sequence, with the most  
476 recent iteration of methods relying on deep neural networks to achieve high state-of-the-art performance. However,  
477 current classification-based methods assign predicted binding probabilities to the entire input sequence, typically in  
478 the order of hundreds of nucleotides, creating ambiguity with respect to the exact location of protein-RNA interaction.  
479 Further, the binary labels used in context of classifiers may only contain a fraction of biological information generated by  
480 CLIP experiments, which may hinder the learning of complex associations between RNA sequence and RBP-binding.

481 The implicit common goal of protein-RNA prediction methods is a near perfect recapitulation of binding information  
482 offered by their *in vivo* experimental counterparts, which generate nucleotide-wise counts signal across the transcriptome.  
483 In this study, we presented a significant milestone towards this goal in the form of a novel deep learning model, RBPNet,  
484 which predicts the CLIP-seq signal shape from RNA sequence at single-nucleotide resolution. By training and evaluating  
485 RBPNet on eCLIP, miCLIP and iCLIP datasets, we demonstrated that the model is able to predict the experimental  
486 signal shape at high accuracy, reaching replicate-level performance and is applicable to data from different CLIP-based  
487 protocols. We leveraged RBPNet's ability to process sequences of arbitrary length at prediction time and impute signal  
488 shape on entire gene sequences, some of hundreds of kilo-bases in size, and showed that high-scoring positions predicted  
489 by RBPNet coincided with single-nucleotide peaks identified from experimental data via the PureCLIP peak caller. Due  
490 to their fundamentally different outputs, establishing unbiased comparisons between RBPNet and classification-based  
491 models is challenging, as the later assigns predictions to sequence windows rather than individual positions by design.  
492 To enable comparison with DeepRiPe, a state-of-the-art CNN classifier, we there generated pseudo position-wise  
493 scores via a sliding window approach, and showed that RBPNet significantly outperforms DeepRiPe at recapitulation of  
494 PureCLIP crosslink sites. This demonstrates that identification of protein-RNA interactions at nucleotide-resolution can  
495 not be solved by current classification-based models, stressing the need for new approaches and highlights the novelty  
496 of RBPNet, as it is the first method that attempts to prediction protein-RNA interaction at nucleotide resolution.

497 Unspecific background signal, as well as experimental biases, are an inherent issue of CLIP-based protocols and thus  
498 downstream analysis, as bias towards certain sequence elements confounds the learning of genuine, protein-specific  
499 sequence features by modeling approaches. For classification-based models, few strategies have been developed  
500 to prevent models from learning bias instead of true signal. For instance, Pysster [5] compiles its negative labeled  
501 training set for a given RBP by sampling sequences from binding regions of other RBPs, thus explicitly introducing the  
502 same sequence biases of the positive set into the negative set, rendering them non-discriminative for the two classes.  
503 Similarly, DeepRiPe performs multi-task learning for several RBPs and only trains on sequences that harbor at least one  
504 experimentally identified binding site, such that biases associated with CLIP peaks are present in all input sequences.  
505 Yan et al. [57] address the RNase T1 cleavage bias towards guanine in the context of PAR-CLIP and HITS-CLIP by  
506 replacing nucleotides in a short window up-and downstream of the input sequence viewpoint with uniformly drawn  
507 random nucleotides. In contrast to the above strategies, which exclusively rely on manual manipulation of the training  
508 data, RBPNet accounts for experimental bias directly as part of its architecture by modeling the control signal as an  
509 auxiliary task. Specifically, RBPNet learns a component which explains the difference in signal shape of the experiment  
510 and a paired control, the target track, which is expected to be depleted of experimental bias and instead enriched  
511 in protein-specific signal. As the *target* signal is not observed experimentally, we instead quantitatively evaluated  
512 the ability of RBPNet tracks to recover known RBP binding motifs and showed that the *target* track recovers motifs  
513 significantly better than the *total* track, with the later modeling the (possibly biased) observed signal. Orthogonal  
514 comparison with 5-mers derived from *in vitro* experiments further showed that the RBPNet *target* track performs  
515 comparable to PEKA, a state-of-the-art *de novo* motif discovery tool. This result is remarkable, as RBPNet is not a  
516 motif finder by design and the extracted motifs are derived only in retrospect via model interrogation. Both the RBPNet  
517 *target* and *total* tracks outperformed DeepRiPe on the task of *in vitro* motif recovery, which highlighted the advantage  
518 of learning directly on the bulk of raw experimental signal rather than a compressed representation in the form of binary  
519 labels, which may be associated with loss of information. The fact that RBPNet is trained on up to a million (in case of  
520 HNRNPC) regions enriched in CLIP-seq signal per RBP may further contribute towards its generalization power. In  
521 contrast, classifiers such as DeepRiPe [14] or Pysster [5] are trained on datasets the size of 10-100 thousand samples.

522 We demonstrated that RBPNet models can be utilized to score the impact of sequence variants on protein-RNA  
523 interaction via *in silico* mutagenesis. For instance, we showed that RBPNet scores single-nucleotide variant within  
524 known binding motifs or splice junctions significantly higher than randomly selected background variants. This indicates

TOWARDS IN-SILICO CLIP-SEQ: PREDICTING PROTEIN-RNA INTERACTION VIA SEQUENCE-TO-SIGNAL  
LEARNING

525 that RBPNet models learned to associated individual nucleotides with the presence or absence of CLIP-seq peaks and  
526 that *in silico* probing of the RBPNet model can improve our mechanistic understanding of protein-RNA interaction.

527 Although we demonstrated the power of our approach on several tasks, including CLIP signal shape imputation,  
528 identification of bona fide RBP binding motifs and variant impact scoring, we believe that our results will pave the way  
529 for further downstream applications. A promising future application of RBPNet may be *in silico* peak calling for the  
530 translation of the predicted signal shape into binding sites - a task that is usually performed by peak calling algorithms  
531 in the context of experimental CLIP signal. To achieve that, an open task may be the prediction of absolute signal, i.e.  
532 the number of counts falling onto an input sequence rather than their distribution. While RBPNet was shown to predict  
533 the counts distribution across an input sequence exceptionally well, the lack of a notion of absolute signal hinders a  
534 direct comparison of position-wise probabilities between different RNA sequences. In other words, as RBPNet does not  
535 predict the absolute coverage of the CLIP signal, position-wise probabilities are not directly interpretable as RBP-RNA  
536 binding strength. On the other hand, this issue is not exclusive to RBPNet, with CLIP peak calling algorithms suffering  
537 from a similar issue due to observed position-wise crosslink counts being subject to transcript abundances. Therefore,  
538 many peak callers compute position-wise binding site thresholds on a transcript-to-transcript basis (Clipper<sup>4</sup>) or with  
539 respect to the local neighborhood (Clippy<sup>5</sup>, Paraclu<sup>6</sup>), a strategy that may be adapted for RBPNet. Nevertheless, future  
540 work may explore the feasibility of absolute signal prediction, for instance by incorporating transcript abundance  
541 coefficients as model covariates. Avsec et al. [2] demonstrate that the BPNet model may be used to unravel the motif  
542 syntax underlying TF cooperativity. In a similar way we envision, as future direction, the application of RBPNet to  
543 discover the sequence rules of RBP cooperativity, something that has been only rarely addressed by previous studies.  
544 However, CLIP datasets vary greatly in quality, with respect to sequencing depth, number of replicates, replicate  
545 consistency, signal-to-noise ratio, and presence or absence of control libraries. While the unique feature of RBPNet  
546 to disentangle true signal from noise can in principle enable the accurate identification of composite binding motifs  
547 and RBP cooperativity while mitigating the effect of confounding sequence bias, a systematic evaluation of CLIP-seq  
548 dataset quality will be necessary to achieve this goal.

---

<sup>4</sup><https://github.com/YeoLab/clipper>

<sup>5</sup><https://github.com/ulelab/clippy>

<sup>6</sup><https://gitlab.com/mcfrith/paraclu>

## 549 **4 Conclusion**

550 We presented RBPNet, a sequence-to-signal model that predict the distribution of crosslinking events across an input  
551 RNA sequence at single-nucleotide resolution. Training and evaluation of RBPNet on 103 eCLIP datasets showed  
552 high performance of RBPNet in terms of signal shape correlation, while evaluation on miCLIP and iCLIP datasets  
553 demonstrated the models generalization to other CLIP-based protocols. We utilized RBPNet's ability to handle variable-  
554 length input sequence to perform inference on whole-transcript and showed that predicted high-probability positions  
555 coincide with PureCLIP peaks, outperforming state-of-the-art classifiers. To account for experimental biases, we  
556 additionally modeled the signal distribution of paired control experiments and derived a de-biased component, the  
557 RBPNet *target* track, which is enriched in protein-specific signal. We showed that feature importance analysis of  
558 the de-biased RBPNet *target* yielded informative sub-sequences which recall *in vitro* motifs at levels comparable to  
559 state-of-the-art motif detectors. Finally, we demonstrated RBPNet's ability to score the impact of SNVs on protein-RNA  
560 interaction, which enables prioritization disease-associated variants that disrupt regulatory RNA sequence by causing  
561 gain or disruption of RBP binding sites. RBPNet represents a significant milestone towards full *in silico* imputation  
562 of protein-RNA interaction, while model interpretation suggest that learning on the raw CLIP signal captures more  
563 experimental variants, improving our mechanistic understand of protein-RNA interaction.

## 564 **5 Methods**

### 565 **5.1 Data and Preprocessing**

#### 566 *ENCODE eCLIP*

567 A total of 103 enhanced CLIP (eCLIP) datasets across 103 RBPs from the HepG2 cell line, were obtained from the  
568 ENCODE database [[53]]. Each dataset consists of an eCLIP experiment with two replicates and one size-matched  
569 input (SMInput) control experiment, which omits the protein-specific immunoprecipitation step and is thus enriched  
570 in unspecific background signal. For each eCLIP and SMInput experiment, aligned R2 reads, (i.e. reads who's start  
571 positions likely correspond to the position immediately down-stream of the RBP cross-linking site) were extracted  
572 from the experiment BAM file via SAMtools [[35]]. Next, reads obtained from the both eCLIP replicates were merged  
573 and 5' read-start coverage for both plus and minus strands was computed via BEDtools [[44]].

#### 574 *miCLIP*

575  $m^6A$  individual-nucleotide resolution UV crosslinking and immunoprecipitation (miCLIP) datasets for HEK293T and  
576 mESC cells were obtained from Kortel et al. [30], comprising 4 and 2 replicates, respectively. In addition, miCLIP  
577 datasets for the mESC cell line are paired with 2 replicates of a METTL3 KO control experiment. For all datasets,  
578 bigWig files of crosslink count signals were directly obtained from the Gene Expression Omnibus (GEO) at the  
579 accession number GSE163500. Note that bigWig files of reads without C-to-T transitions were selected, as these reads  
580 represent read-through events and would result in unspecific truncation count signal. Lastly, replicates of each dataset  
581 were merged by summing of the position-wise crosslink counts.

#### 582 *iCLIP*

583 Individual-nucleotide CLIP (iCLIP) datasets for TDP43 and PTBP1, each with two replicates and without control  
584 experiments, were obtained from Hallegger et al. [18] and Haberman et al. [15], respectively. Replicates were  
585 downloaded from the Sequence Read Archive (SRA) with accession codes ERS10930255 and ERS10930256 for TDP43  
586 and ERR1588764 and ERR1588765 for PTBP1, and processed as described in [56]. The source code for the processing  
587 pipeline is available at <https://github.com/ulelab/ncawareclip>.

### 588 **5.2 Selecting Candidate Sites for Training**

589 In order to speed up convergence of RBPNet, it is important to restrict model training to regions with significant  
590 crosslink count signal. In the context of BPNet [2], the authors therefore performed peak calling on ChIP-nexus data to  
591 select a set of regions highly enriched in count signal. However, recent work by Toneyan et al. [51] suggests that peak  
592 callers select sites too conservatively, which may result in under-fitting of sequence-to-signal models.

593 To train RBPNet on ENCODE eCLIP datasets, we select a large set of candidate sites as follows. Given the set of genes  
594 retrieved from the GENCODE (version 40) [10], a sliding window of size 100 is shifted over each gene ( $stride = 1$ )  
595 and the total number of counts within each window, as well as the highest positional count is obtained. Next, a p-value  
596 is computed for each window via a Poisson test by comparing the observed window counts to the expected counts,  
597 given the gene-level crosslink counts and the gene-length. At each step, windows with a p-value  $< 0.01$ , a minimum  
598 window count of  $N = 8$  and a minimum count *height* (i.e. maximum position-wise count within the window) of  
599  $H = 2$  are recorded as candidates and the sliding window is shifted forward by 50 nucleotides. This avoids clusters  
600 of redundant candidate sites within transcript regions. Finally, selected 100nt windows are extended symmetrically  
601 up-and down-stream to a final length of 300nt. Note that since RNA is a stranded molecule, counts are obtained for  
602 each gene in a strand-specific manner.

603 For miCLIP datasets, similar parameters together with GENCODE vM23 for the mESC cell line where used. For iCLIP  
604 datasets, the minimum window threshold was reduced to  $N = 4$ , due to a lower sequencing depth.

### 605 **5.3 RBPNet Architecture**

606 The body model architecture of RBPNet was inspired by BPNet [2]. RBPNet takes as input a 300nt RNA sequence,  
607 which is one-hot encoded by mapping the bases A, C, G and U to binary vectors [1, 0, 0, 0], [0, 1, 0, 0], [0, 0, 1, 0] and  
608 [0, 0, 0, 1], respectively. The  $300 \times 4$  dimensional input is then fed into a 1D convolution layer with 128 filters of size  
609 12, followed by 9 residual blocks. Each residual block consists of (1) a 1D dilated convolution layer with 128 filters  
610 of size 6 and exponentially increasing dilation factor, (2) a batch normalization layer, (3) a ReLU activation and (4)  
611 a dropout layer with a dropout rate of 0.25, respectively. The output of the last residual block (hereafter referred to

## TOWARDS IN-SILICO CLIP-SEQ: PREDICTING PROTEIN-RNA INTERACTION VIA SEQUENCE-TO-SIGNAL LEARNING

612 as 'bottleneck' layer) then serves as input to one or more output heads, where each output head corresponds to one  
613 of the modeling tasks, for instance the prediction of eCLIP signal and (optionally) SMInput shape. This is outlined  
614 schematically in Figure 1b. Each output head consist of a transposed 1D convolutional layer with a single filter of size  
615 20, mapping the bottleneck feature map to a 300-dimensional output vector, which corresponds to the position-wise  
616 probabilities of the count distribution within the input window. Notably, as in BpNet [2], same-padding and no pooling  
617 is used across all convolution operations in order to conserve the one-to-one correspondence of input sequence positions,  
618 feature maps and outputs.

### 619 5.4 RBPNet Training

620 Prior to model training, candidate sites obtained in 5.2 were split chromosome-wise into validation (chr2, chr9, chr16),  
621 hold-out (chr1, chr8, chr15) and train (all other autosomes) sets for both human and mouse cell lines. RBPNet is trained  
622 using the Adam optimizer [[28]] and an initial learning rate (LR) of 0.004. Training is performed for a maximum of 50  
623 epochs with an early-stopping criteria such that training terminates prematurely if the validation loss did not decrease  
624 within the last 10 epochs. In addition, a LR scheduler is used such that the LR is halved each time the validation loss  
625 did not improve within the last 6 epochs.

### 626 5.5 RBPNet Loss

627 The output vector  $p_{pred}^h$  of each track  $h$  (e.g. eCLIP or SMInput) is used to parameterize a multinomial distribution of  
628 read-start counts. For a given training instance, the loss is then computed as the negative log-likelihood of the observed  
629 (true) counts  $c_{obs}^h$ , given the total counts  $n_{obs}^h$  in the input region and the probability vector  $p_{pred}^h$ . That is, the model's  
630 loss  $L^h$  on a task  $h$  is defined as

$$L^h = L(p_{pred}^h, c_{obs}^h, n_{obs}^h) = -\log p_{mult.}(c_{obs}^h | p_{pred}^h, n_{obs}^h) \quad (1)$$

631 The total loss  $L$  is then obtained by taking the sum over all task-specific losses.

### 632 5.6 RBPNet Bias Correction

633 Experimental bias can lead to unspecific eCLIP signal, severely impacting the downstream binding preference analysis.  
634 Therefore, CLIP-seq experiments are usually paired with a control experiment to measure the abundance of background  
635 signal at each locus. Assuming that a single read-start count is observed either due to true protein-specific (*target*)  
636 signal or experimental bias (*control*), RBPNet models the total CLIP-seq signal as an additive multinomial mixture of  
637 the target and bias distributions. That is,

$$p_{total} = \pi \times p_{target} + (1 - \pi) \times p_{control}, \quad (2)$$

638 where  $p_{total}$  is the probability vector of the total (e.g. eCLIP) signal, while  $p_{control}$  and  $p_{target}$  are the probability  
639 vectors of the control and (unobserved) target signal, respectively. Further,  $\pi/(1 - \pi)$  is the relative intensity of the  
640 target over the bias signal, given by a mixing coefficient  $\pi$ . Note that  $\pi$ ,  $p_{target}$  and  $p_{control}$  are learned directly from  
641 sequence for each RBP. To ensure that  $p_{control}$  properly approximates the *control* signal distribution over the input  
642 sequence, a combined loss on the *total* and *control* tracks is defined as

$$L = L_{CLIP}(p_{total}, c_{CLIP}, n_{CLIP}) + L_{Ctrl}(p_{control}, c_{Ctrl}, n_{Ctrl}), \quad (3)$$

643 such that  $p_{control}$  is penalized to match the distribution of counts in the control experiment. Once the RBPNet model is  
644 trained we can obtain an approximation of the bias-free signal component as  $p_{target}$ . A graphical outline of a RBPNet  
645 forward pass with bias correction via an additive mixture of *target* and *control* signal is shown in Supplementary Figure  
646 1.

### 647 5.7 Estimating the Additive Mixing Coefficient

648 The contribution of target and bias signal towards the total signal is expected to be dependent on the input sequence. For  
649 instance, in the presence of multiple RBP binding motifs, the majority of counts may be observed due to protein-specific  
650 crosslinking, while under absence of clear binding motifs, crosslinking biases may dominate. RBPNet therefore  
651 estimates the multinomial mixing coefficient  $\pi$  from the input sequence. Given the feature map of the bottleneck layer  
652 (Section 5.3), filter-wise global average pooling is performed along the sequence axis. The resulting 128-dimensional

## TOWARDS IN-SILICO CLIP-SEQ: PREDICTING PROTEIN-RNA INTERACTION VIA SEQUENCE-TO-SIGNAL LEARNING

653 representation of the sequence is then fed into a 1-unit dense layer with linear activation to predict the logit of the  
654 mixing coefficient.

### 655 5.8 Disentangling Target and Control Signals

656 Given equation 2 together with the total number of counts  $N$ , we can disentangle the eCLIP signal into the expect  
657 control and target counts:

$$E_{target} = \pi \times p_{target} \times N \quad (4)$$

658

$$E_{control} = (1 - \pi) \times p_{control} \times N \quad (5)$$

### 659 5.9 Sequence Importance Scores

660 To identify RNA sequence features that contributed significantly to the predicted signal distribution, we compute  
661 integrated gradients (IG) attribution scores [[50]] of input sequence with respect to the output probability vector  $p$  for  
662 each track. This way, we obtain separate attribution maps for predicted total, target and control signals.

663 By default, the IG attribution method assumes a classification-based setting, where gradients are computed with  
664 respect to the output probability of a target class of interest. For instance in the context of classification-based models,  
665 attributions may be computed with respect to a single output neuron describing the binding probability of the target  
666 RBP to the input RNA. Here, the resulting feature importance values quantify how much each feature contributed  
667 towards the target class. For instance, DeepRiPe employs IG to identify nucleotides that were contributed towards  
668 predicting an input sequence as "bound" for a target RBP. In contrast to classification-based methods, RBPNet predicts  
669 a 1D profile for each RBP and input sequence. Computing IG attribution maps with respect to only a single position in  
670 the output track may draw an incomplete picture of nucleotide-wise contributions towards the predicted signal footprint.  
671 We therefore introduce a generalization of IG from scalar to 1D profile outputs.

672 Given an observed input  $x$  and a baseline input  $x'$ , the IG score of an input feature  $x_i$  is defined as

$$IG_i(x) := (x_i - x'_i) \times \int_{\alpha=0}^1 \frac{\partial F(x' + \alpha \times (x - x'))}{\partial x_i} d\alpha \quad (6)$$

673 where  $F$  is a scalar function. In the simplest case of binary classification, where the deep neural network  $f$  has a scalar  
674 output,  $F = f$ . In the case of multi-class classification,  $F$  is usually defined as  $F(x) = \sum_i p_i y_i$ , where  $p = f(x)$  is  
675 the multi-class probability vector and  $y$  the true label vector with  $y_i \in \{0, 1\}$ , such that IG scores of  $x$  are obtained with  
676 respect to its true class. A natural extension of  $F$  to count data is given by

$$F(x) = \sum_i p_i c_i \quad (7)$$

677 where  $p$  is the multinomial probability vector and  $c$  is the vector of true counts, with the desirable effect that predictions  
678 at positions with high counts will dominate the input gradients. The extension of  $F$  in (8) has two major drawbacks.  
679 First, it requires true counts  $c$  for a given sequence to compute attribution scores and second, it might up-weight  
680 positions with high counts that are due to experimental bias. We thus reformulate  $F$  as

$$F(x) = \sum_i p_i \times stop\_grad(p_i) \quad (8)$$

681 where  $stop\_grad(x)$  stops gradients flow and treats  $x$  as a constant.

682 In other words, instead of computing gradients with respect to the scalar of a single output neuron, we compute gradients  
683 of the RNA sequence nucleotides with respect to the sum of the output profile, weighted by a constant version of itself.  
684 The weighting ensures that output positions with high probability contribute more towards the nucleotide-wise feature  
685 importance scores than low-probability positions.

686 Note that the proposed generalization of Integrated Gradients to output probability vectors is in analogy to Avsec et al.'s  
687 generalization of DeepLIFT [48] scores, described in [2].

688 By computing gradients with respect to  $p_{target}$  (rather than  $p_{total}$ ), we explicitly remove contributions of the sequence  
689 towards experimental bias and thus focus solely nucleotides that contribute towards the protein-specific crosslinking  
690 signal. In general, attribution scores of the total, target and control tracks may be disentangled via



## TOWARDS IN-SILICO CLIP-SEQ: PREDICTING PROTEIN-RNA INTERACTION VIA SEQUENCE-TO-SIGNAL LEARNING

$$F_{total} = F_{target} + F_{control} = [\pi \times \sum_i c_i p_i^{target}] + [(1 - \pi) \times \sum_i c_i p_i^{control}]. \quad (9)$$

### 691 5.10 Performance Evaluation

#### 692 5.10.1 Pearson Correlation Performance

693 Given the set of 300nt sequences in the hold-out test set, Pearson correlation coefficients (PCC) between RBPNet  
694 predictions and the observed crosslink counts, merged between both replicates, were computed. For each eCLIP  
695 experiment, the final PCC performance metric is obtained by taking the mean PCC across all test-set sequences.

#### 696 5.10.2 Comparison with PureCLIP Crosslink Sites

697 PureCLIP is a single-nucleotide peak caller that identifies significant crosslink (CL) sites by fitting a Hidden Markov  
698 Model over the CLIP count signal. To further validate profile predictions made by RBPNet, we investigated whether  
699 scores at positions within PureCLIP CL sites are significantly higher than scores outside of CL sites. To this end, we  
700 performed PureCLIP CL site 'peak' calling on all ENCODE eCLIP and miCLIP experiments using default parameters.  
701 As suggested by Krakau et al. [31], replicate BAM files were merged to enable the use of signal information across all  
702 replicates during peak calling. For ENCODE eCLIP and the mESC miCLIP experiment, PureCLIP was additionally  
703 provided BAM files of the control experiment to refine the set of CL sites based on significant enrichment over the  
704 control. This was omitted for the HEK miCLIP experiment, as no paired control experiment was available.

705 For each dataset, transcripts on the hold-out chromosomes (5.4) were intersected with PureCLIP CL sites and only  
706 transcripts harboring at least one CL sites were retained, ensuring that the transcript was expressed in the given  
707 experiment. Next, whole-transcript predictions were performed with RBPNet, yielding a probability vector of CL  
708 enrichment summing up to 1 for each retained transcripts. To measure how well RBPNet predictions discriminate  
709 between CL and non-CL sites, the area under the ROC curve (auROC) and the average precision (AP) scores were  
710 computed for each transcript. The auROC score may be a more adequate measure of the discriminative power of  
711 RBPNet than AP, as the baseline of the AP score is subject to the imbalance of CL and non-CL sites, which are different  
712 for each transcript. Further, the auROC is closely related to the Wilcoxon statistic and represents probability of ranking  
713 a randomly chosen CL sites above a randomly chosen non-CL site within each transcript, thus directly measuring  
714 the discriminative power of the model. Note that within-transcript evaluation is necessary because the position-wise  
715 RBPNet scores are subject to transcript length as well as the propensity of RBP binding within the transcript. The  
716 finally scalar performance metric for each experiment is then obtained by taking the mean auROC and AP scores across  
717 all transcripts.

718 We additionally evaluated RBPNet against DeepRiPe, a state-of-the-art deep learning model for prediction of protein-  
719 RNA interaction, on ENCODE eCLIP datasets. To this end, trained DeepRiPe models for 70 ENCODE HepG2 cell  
720 line were obtained from Ghanbari et al. [14]. As DeepRiPe is a classification-based model, the predicted binding  
721 probability score is assigned to an entire input regions. To make RBPNet and DeepRiPe comparable on the task of  
722 separate PureCLIP CL sites from non-CL sites, we obtained pseudo single-nucleotide resolution scores for DeepRiPe  
723 by applying same padding to the transcript sequence, before shifting a sliding window of 150nt (DeepRiPe input size)  
724 across the sequence and assigning the prediction score to the center position of the current window.

### 725 5.11 Motif Discovery and Evaluation

#### 726 5.11.1 RBPmap Motif Evaluation

727 To quantitatively evaluate the ability of RBPNet to recover known RBP binding motifs in its sequence attribution maps,  
728 we compare high-attribution sub-sequences with known binding motifs in the form of position-weight matrices (PWMs)  
729 reported in literature. To this end, we first gathered the PWMs of 29 RBPs with both ENCODE eCLIP experiments and  
730 reported literature motifs from the RBPmap database [43]. Next, for each eCLIP experiment, the top 5000 ENCODE  
731 narrow peaks were selected and profile predictions were performed on a 300nt window around the 5' end of the peak,  
732 as this positions has previously been reported to harbor the CL site [8]. After computing attribution maps with respect to  
733 the RBPNet *total*, *target* and *control* tracks, the 5-mer with highest sum of attribution ( $IG_{sum}$ ) was extracted for each  
734 sequence and track. The similarity of each 5-mer to the reference PWM(s) of the RBP was then computed as the mean  
735 of the position-wise Jensen-Shannon divergence (JSD) to base 2, a symmetric version of the KL divergence within the  
736 bounds  $[0, 1]$ , where 1 indicates perfect similarity. To account for cases where 5-mers represent truncated motifs or  
737 match the reference PWM at a different position offset (i.e. shifted up-or down-stream), we slide each 5-mer over its  
738 reference PWM, with a required overlap fraction of 3nt. At each shift, the JSD is computed and the final similarity of

## TOWARDS IN-SILICO CLIP-SEQ: PREDICTING PROTEIN-RNA INTERACTION VIA SEQUENCE-TO-SIGNAL LEARNING

739 the 5-mer and the PWM is taken as the maximum similarity over all shift. In cases in which more than one motif PWM  
740 is reported for a given RBP in the RBPmap database, similarity computation is performed with respect to all PWMs and  
741 the final similarity score is taken as the maximum similarity between the 5-mer and all PWMs of that RBP.

### 742 5.11.2 *In Vitro* Motif Evaluation

743 *In vitro* data on protein-RNA interaction was obtained in the form of k-mer z-scores for RNA-Bind-n-Seq (RBNS)  
744 and RNAcompete experiments from Dominquez et al. [8] and Ray et al. [46], respectively. For RBNS, 5mer  
745 enrichment scores (*R scores*) for 78 RBPs were obtained from the ENCODE resource, using accession numbers listed  
746 in [8]. For each RBP, the *R scores* for the concentration with the highest enrichment were converted to z-scores,  
747 by calculating their mean and standard deviation. RNAcompete 7-mer z-scores for 80 RBPs were obtained from  
748 Ray et al. [46]. In cases where both RNA-Bind-N-Seq and RNAcompete were available for a particular protein, we  
749 prioritized RBNS for downstream analysis, as RBNS z-scores were readily available for 5-mers, whereas RNAcompete  
750 required transformation from 7-mer to 5-mer scores. The conversion of 7-mer scores to 5-mer scores was performed by  
751 calculating the mean score across all 7-mers that contain a given 5-mer. 7-mers which contain a particular 5-mer more  
752 than once were considered as many times as the number of occurrences of the contained 5-mer. For illustration, when  
753 calculating the arithmetic mean of z-scores for a 5-mer 'UUUUU', the 7-mer 'UUUUUUG' would be considered twice  
754 ('[UUUUU]UG', 'U[UUUUU]G'). *In vitro* 5-mers of each RBP were then sorted in a descending order based on their  
755 enrichment scores and ranked from most (ranked 1st) to least enriched (ranked last).

756 For evaluation of RBPNet with *in vitro* 5-mers, 5-mers with highest  $IG_{sum}$  were extracted from RBPNet attribution  
757 maps of the top 5,000 ENCODE narrow peaks for each track, as described in 5.11.1. Further, DeepRiPe ENCODE  
758 models were obtained from [14] and unique 5-mer counts were obtained in a similar manner by first computing IG  
759 attribution maps on a 150nt input window around ENCODE narrow peaks and subsequently selecting 5-mers of  
760 highest  $IG_{sum}$  for each narrow peak sequence (Methods 5.11.1). For each unique RBPNet and DeepRiPe 5-mer, a  
761 relevance score was then computed by taking the sum of  $IG_{sum}$  scores. RBPNet and DeepRiPe 5-mers were then  
762 sorted decreasingly with respect to their relevance score. Lastly, we obtained 5-mer enrichment scores calculated with  
763 PEKA<sup>7</sup> (v0.1.6), a motif discovery tool, for all ENCODE eCLIP datasets from [32] (Reference Additional File 5). We  
764 used PEKA-scores that were produced with Clippy peaks [56] to rank the k-mers from most to least enriched. As  
765 DeepRiPe models were only available for 70 out of 103 ENCODE HepG2 RBPs, and only 27 of those had orthogonal  
766 *in vitro* data available, the evaluation of recall was therefore restricted to those proteins. Out of 27 eCLIP datasets, 16  
767 were compared to RBNS and 11 were compared to RNAcompete for recall analysis. Finally, an *in vitro* recall score  
768 was computed for each RBP and method by taking the proportion of top 20 5-mers from the corresponding RBNS  
769 or RNAcompete dataset that were recovered among the top 20 5-mers in eCLIP, as ranked by the RBPNet tracks,  
770 DeepRiPe and PEKA.

### 771 5.11.3 Consensus Motif Construction

772 Representative consensus motifs for each eCLIP library were constructed as follows. Given the set of k-mers obtained  
773 in Section 5.11.1, k-mers were first sorted by their  $IG_{sum}$  score in descending order. Iterating from the top of the list,  
774 the first k-mer is used to seed an initial motif alignment, with consecutive k-mers being aligned (without gaps) to the  
775 seed k-mer by sliding the given k-mer over the seed alignment and requiring a minimum overlap of 3nt. If no alignment  
776 with at least 3 matches is found, the k-mer is considered non-alignable and is instead used to seed a new motif alignment.  
777 Consecutive k-mers are aligned to seed alignments in the order of their creation and, if no sufficient alignment is found,  
778 are used to seed further motifs alignments on-the-fly. Subsequently, consensus motifs are constructed for each alignment  
779 by computing the position-wise nucleotide frequencies within alignments. Consensus motifs can then be prioritized  
780 based on the number of supporting k-mers in the underlying alignment. The motif finding procedure was implemented  
781 as part of the following Git repository: <https://github.com/mhorlacher/metamotif>

### 782 5.12 Variant Impact Scoring

783 The predicted distribution of counts by RBPNet is solely driven by the input RNA sequence and thus one expects that  
784 single-nucleotide variants (SNVs) that fall within crucial sequence feature, such as binding motifs, will have a profound  
785 impact on the predicted signal footprint. Therefore, to approximate the impact of a SNV on RBP binding, we quantify  
786 the change of the distribution of counts of the alternative allele compared to the reference. To this end, we define the  
787 change of count distribution with respect to a given SNV as the KL divergence of the prediction on the SNV-associated  
788 allele from the prediction on the reference allele. The variant impact score  $KLD_{SNV}$  is thus defined as

<sup>7</sup><https://github.com/ulelab/peka>

TOWARDS IN-SILICO CLIP-SEQ: PREDICTING PROTEIN-RNA INTERACTION VIA SEQUENCE-TO-SIGNAL  
LEARNING

$$KLD_{SNV} = KLD(p^{REF}, p^{ALT}). \quad (10)$$

789 **5.12.1 Variant impact scoring of splicing mutations**

790 40 out of 103 RBPs with trained RBPNet-eCLIP models were manually annotated as related to splicing, following  
791 the annotations from Nostrand et al. [55] and the HGNC spliceosomal complex groups from the HGNC database  
792 [52]. Of these, 21 were further annotated as directly involved in the spliceosome. Next, a set of 260 experimentally  
793 validated splicing-related mutations was obtained from MutSpliceDB [40]. After excluding mutations with a distance  
794 of more than 10nt from splicing junctions (defined as the first two and last two positions from intronic regions in human  
795 coding genes of GENCODE V40 [10]), a set of 232 mutations was retained. For negative controls, we retrieved 6,087  
796 mutations from gnomAD v2.1.1 ([24]) located within 100nt up- or down-stream of the retained splicing mutations.  
797 Control mutations which intersected with the set of splicing-associated mutations were filtered out. Subsequently,  
798 RBPNet impact scoring (5.12) was performed on all mutations. For each RBP, a one-sided Wilcoxon ranked sum test  
799 was performed to evaluate the enrichment of high-impact splicing-associated mutations over control mutations. P-values  
800 were corrected for multiple testing via Benjamini-Hochberg correction, and significance was tested for  $\alpha = 0.05$ . The  
801 same procedure was applied for 30 of the 70 DeepRiPe models found in common with the 40 RBPNet models, taking  
802 the models trained from ENCODE HepG2 using both sequence and genomic annotations. Here, the impact score was  
803 calculated as the absolute difference in prediction score for a given RBP between the alternative and the reference allele.

## 804 **6 Declarations**

### 805 **Ethics approval and consent to participate**

806 Not applicable.

### 807 **Consent for publication**

808 Not applicable.

### 809 **Availability of data and materials**

810 Code for RBPNet training, evaluation, feature importance analysis and variant impact scoring is available at <https://github.com/mhorlacher/rbpnet>. Code for consensus motif construction is available at <https://github.com/mhorlacher/metamotif>. Code in both repositories is available under the MIT license.

813 All data processed in this study was obtained exclusively from public sources. CLIP-seq data was obtained from  
814 ENCODE [53] (eCLIP), Kortel et al. [30] (miCLIP) and Hallegger et al. [18] and Haberman et al. [15] (iCLIP).  
815 *In vitro* data on protein-RNA interaction was obtained from Dominquez et al. [8] (RNA-Bind-n-Seq) and Ray et al.  
816 [46] (RNAcompete). Splicing-related mutations were obtained from MutSpliceDB [40], while further mutations were  
817 obtained from gnomAD [24]. Information on allele-specific binding events was taken from Yang et al. [58].

### 818 **Competing interests**

819 The authors declare no competing interests.

### 820 **Funding**

821 This work was supported by the Helmholtz Association under the joint research school "Munich School for Data Science  
822 (MUDS)" to M.H., N.W., J.G. and A.M., the Deutsche Forschungsgemeinschaft (SFB/TR501 84 TP C01) to A.M. and  
823 L.M. and (SFB/Transregio TRR267) to J.G.; O.W.'s work was funded in part by the Novo Nordisk Foundation through  
824 the Center for Basic Machine Learning Research in Life Science (NNF20OC0062606). O.W. further acknowledges  
825 support from the Pioneer Centre for AI, DNRF grant number P1; K.K.'s and J.U.'s work was funded by the European  
826 Union's Horizon 2020 research and innovation programme (835300-RNPdynamics). K.K. and J.U. further acknowledge  
827 support from The Francis Crick Institute, which receives its core funding from Cancer Research UK (FC001110), the  
828 UK Medical Research Council (FC001110), and the Wellcome Trust (FC001110).

### 829 **Authors' contributions**

830 M.H. and A.M. conceived the project. M.H. collected and processed the datasets, conceptualized and implemented the  
831 RBPNet model with help from O.W.; N.W. and L.M. performed analysis of allele-specific binding events and splice-site  
832 mutations, respectively, with help from M.H.; K.K. performed binding motif recall analysis on *in vitro* binding data.  
833 N.G. helped processing datasets and training RBPNet models. O.W. and A.M. supervised and guided the project, with  
834 inputs from M.S., J.U. and J.G.; M.H. wrote the manuscript with help from K.K., N.W., A.M. and L.M. and inputs from  
835 O.W., J.G. and J.U.; All authors reviewed and approved the final manuscript.

### 836 **Acknowledgements**

837 Not applicable.

TOWARDS IN-SILICO CLIP-SEQ: PREDICTING PROTEIN-RNA INTERACTION VIA SEQUENCE-TO-SIGNAL  
LEARNING

838 **References**

- 839 [1] B. Alipanahi, A. Delong, M. T. Weirauch, and B. J. Frey. Predicting the sequence specificities of dna-and  
840 rna-binding proteins by deep learning. *Nature biotechnology*, 33(8):831–838, 2015.
- 841 [2] Ž. Avsec, M. Weilert, A. Shrikumar, S. Krueger, A. Alexandari, K. Dalal, R. Froppf, C. McAnany, J. Gagneur,  
842 A. Kundaje, et al. Base-resolution models of transcription-factor binding reveal soft motif syntax. *Nature Genetics*,  
843 53(3):354–366, 2021.
- 844 [3] T. L. Bailey, M. Boden, F. A. Buske, M. Frith, C. E. Grant, L. Clementi, J. Ren, W. W. Li, and W. S. Noble. Meme  
845 suite: tools for motif discovery and searching. *Nucleic acids research*, 37(suppl\_2):W202–W208, 2009.
- 846 [4] S. Bergstrand, E. M. O’Brien, C. Coucoravas, D. Hrossova, D. Peirasmaki, S. Schmidli, S. Dhanjal, C. Pederiva,  
847 L. Siggens, O. Mortusewicz, et al. Small cajal body-associated rna 2 (scarna2) regulates dna repair pathway  
848 choice by inhibiting dna-pk. *Nature communications*, 13(1):1–18, 2022.
- 849 [5] S. Budach and A. Marsico. Pysster: classification of biological sequences by learning sequence and structure  
850 motifs with convolutional neural networks. *Bioinformatics*, 34(17):3035–3037, 2018.
- 851 [6] X. Chen, Y. Liu, C. Xu, L. Ba, Z. Liu, X. Li, J. Huang, E. Simpson, H. Gao, D. Cao, et al. Qki is a critical pre-mrna  
852 alternative splicing regulator of cardiac myofibrillogenesis and contractile function. *Nature communications*,  
853 12(1):1–18, 2021.
- 854 [7] L. De Conti, M. Baralle, and E. Buratti. Neurodegeneration and rna-binding proteins. *Wiley Interdisciplinary*  
855 *Reviews: RNA*, 8(2):e1394, 2017.
- 856 [8] D. Dominguez, P. Freese, M. S. Alexis, A. Su, M. Hochman, T. Palden, C. Bazile, N. J. Lambert, E. L. Van Nos-  
857 trand, G. A. Pratt, et al. Sequence, structure, and context preferences of human rna binding proteins. *Molecular*  
858 *cell*, 70(5):854–867, 2018.
- 859 [9] R. A. Flynn, J. A. Belk, Y. Qi, Y. Yasumoto, J. Wei, M. M. Alfajaro, Q. Shi, M. R. Mumbach, A. Limaye,  
860 P. C. DeWeirdt, et al. Discovery and functional interrogation of sars-cov-2 rna-host protein interactions. *Cell*,  
861 184(9):2394–2411, 2021.
- 862 [10] A. Frankish, M. Diekhans, I. Jungreis, J. Lagarde, J. E. Loveland, J. M. Mudge, C. Sisu, J. C. Wright, J. Armstrong,  
863 I. Barnes, et al. Gencode 2021. *Nucleic acids research*, 49(D1):D916–D923, 2021.
- 864 [11] A. M. Fredericks, K. J. Cygan, B. A. Brown, and W. G. Fairbrother. RNA-Binding Proteins: Splicing Factors and  
865 Disease. *Biomolecules*, 5(2):893–909, May 2015.
- 866 [12] M. Garcia-Moreno, A. I. Järvelin, and A. Castello. Unconventional rna-binding proteins step into the virus–host  
867 battlefield. *Wiley Interdisciplinary Reviews: RNA*, 9(6):e1498, 2018.
- 868 [13] F. Gebauer, T. Schwarzl, J. Valcárcel, and M. W. Hentze. Rna-binding proteins in human genetic disease. *Nature*  
869 *Reviews Genetics*, 22(3):185–198, 2021.
- 870 [14] M. Ghanbari and U. Ohler. Deep neural networks for interpreting rna-binding protein target preferences. *Genome*  
871 *research*, 30(2):214–226, 2020.
- 872 [15] N. Haberman, I. Huppertz, J. Attig, J. König, Z. Wang, C. Hauer, M. W. Hentze, A. E. Kulozik, H. Le Hir, T. Curk,  
873 et al. Insights into the design and interpretation of iclip experiments. *Genome biology*, 18(1):1–21, 2017.
- 874 [16] M. Hafner, M. Katsantoni, T. Köster, J. Marks, J. Mukherjee, D. Staiger, J. Ule, and M. Zavolan. Clip and  
875 complementary methods. *Nature Reviews Methods Primers*, 1(1):1–23, 2021.
- 876 [17] M. Hafner, M. Landthaler, L. Burger, M. Khorshid, J. Hausser, P. Berninger, A. Rothballer, M. Ascano Jr, A.-C.  
877 Jungkamp, M. Munschauer, et al. Transcriptome-wide identification of rna-binding protein and microRNA target  
878 sites by par-clip. *Cell*, 141(1):129–141, 2010.
- 879 [18] M. Hallegger, A. M. Chakrabarti, F. C. Lee, B. L. Lee, A. G. Amalietti, H. M. Odeh, K. E. Copley, J. D. Rubien,  
880 B. Portz, K. Kuret, et al. Tdp-43 condensation properties specify its rna-binding and regulatory repertoire. *Cell*,  
881 184(18):4680–4696, 2021.
- 882 [19] D. Heller, R. Krestel, U. Ohler, M. Vingron, and A. Marsico. sshmm: extracting intuitive sequence-structure  
883 motifs from high-throughput rna-binding protein data. *Nucleic acids research*, 2017.

TOWARDS IN-SILICO CLIP-SEQ: PREDICTING PROTEIN-RNA INTERACTION VIA SEQUENCE-TO-SIGNAL  
LEARNING

- 884 [20] M. W. Hentze, A. Castello, T. Schwarzl, and T. Preiss. A brave new world of rna-binding proteins. *Nature reviews*  
885 *Molecular cell biology*, 19(5):327–341, 2018.
- 886 [21] M. Horlacher, S. Oleshko, Y. Hu, M. Ghanbari, E. E. Vergara, N. Mueller, U. Ohler, L. Moyon, and A. Marsico.  
887 Computational mapping of the human-sars-cov-2 protein-rna interactome. *bioRxiv*, 2021.
- 888 [22] I. Huppertz, J. Attig, A. D’Ambrogio, L. E. Easton, C. R. Sibley, Y. Sugimoto, M. Tajnik, J. König, and J. Ule.  
889 iclip: protein–rna interactions at nucleotide resolution. *Methods*, 65(3):274–287, 2014.
- 890 [23] K. Izumikawa, Y. Nobe, H. Ishikawa, Y. Yamauchi, M. Taoka, K. Sato, H. Nakayama, R. J. Simpson, T. Isobe,  
891 and N. Takahashi. Tdp-43 regulates site-specific 2-o-methylation of u1 and u2 snrnas via controlling the cajal  
892 body localization of a subset of c/d scarnas. *Nucleic acids research*, 47(5):2487–2505, 2019.
- 893 [24] K. J. Karczewski, L. C. Francioli, G. Tiao, B. B. Cummings, J. Alföldi, Q. Wang, R. L. Collins, K. M. Laricchia,  
894 A. Ganna, D. P. Birnbaum, et al. The mutational constraint spectrum quantified from variation in 141,456 humans.  
895 *Nature*, 581(7809):434–443, 2020.
- 896 [25] H. Kazan, D. Ray, E. T. Chan, T. R. Hughes, and Q. Morris. Rnacontext: a new method for learning the sequence  
897 and structure binding preferences of rna-binding proteins. *PLoS computational biology*, 6(7):e1000832, 2010.
- 898 [26] S. Ke, A. Pandya-Jones, Y. Saito, J. J. Fak, C. B. Vågbo, S. Geula, J. H. Hanna, D. L. Black, J. E. Darnell, and  
899 R. B. Darnell. m6a mrna modifications are deposited in nascent pre-mrna and are not required for splicing but do  
900 specify cytoplasmic turnover. *Genes & development*, 31(10):990–1006, 2017.
- 901 [27] D. R. Kelley, Y. A. Reshef, M. Bileschi, D. Belanger, C. Y. McLean, and J. Snoek. Sequential regulatory activity  
902 prediction across chromosomes with convolutional neural networks. *Genome research*, 28(5):739–750, 2018.
- 903 [28] D. P. Kingma and J. Ba. Adam: A method for stochastic optimization. *arXiv preprint arXiv:1412.6980*, 2014.
- 904 [29] J. König, K. Zarnack, G. Rot, T. Curk, M. Kayikci, B. Zupan, D. J. Turner, N. M. Luscombe, and J. Ule. iclip  
905 reveals the function of hnrnp particles in splicing at individual nucleotide resolution. *Nature structural & molecular*  
906 *biology*, 17(7):909–915, 2010.
- 907 [30] N. Körtel, C. Rücklé, Y. Zhou, A. Busch, P. Hoch-Kraft, F. R. Sutandy, J. Haase, M. Pradhan, M. Musheev,  
908 D. Ostareck, et al. Deep and accurate detection of m6a rna modifications using miclip2 and m6aboost machine  
909 learning. *Nucleic acids research*, 49(16):e92–e92, 2021.
- 910 [31] S. Krakau, H. Richard, and A. Marsico. Pureclip: capturing target-specific protein–rna interaction footprints from  
911 single-nucleotide clip-seq data. *Genome biology*, 18(1):1–17, 2017.
- 912 [32] K. Kuret, A. G. Amaliotti, D. M. Jones, C. Capitanichik, and J. Ule. Positional motif analysis reveals the extent of  
913 specificity of protein-rna interactions observed by clip. *Genome Biology*, 23(1):1–34, 2022.
- 914 [33] A. Labeau, L. Fery-Simonian, A. Lefevre-Utile, M. Pourcelot, L. Bonnet-Madin, V. Soumelis, V. Lotteau, P.-  
915 O. Vidalain, A. Amara, and L. Meertens. Characterization and functional interrogation of the sars-cov-2 rna  
916 interactome. *Cell reports*, 39(4):110744, 2022.
- 917 [34] N. Lambert, A. Robertson, M. Jangi, S. McGeary, P. A. Sharp, and C. B. Burge. Rna bind-n-seq: quantitative  
918 assessment of the sequence and structural binding specificity of rna binding proteins. *Molecular cell*, 54(5):887–  
919 900, 2014.
- 920 [35] H. Li, B. Handsaker, A. Wysoker, T. Fennell, J. Ruan, N. Homer, G. Marth, G. Abecasis, and R. Durbin. The  
921 sequence alignment/map format and samtools. *Bioinformatics*, 25(16):2078–2079, 2009.
- 922 [36] B. Linder, A. V. Grozhik, A. O. Olarerin-George, C. Meydan, C. E. Mason, and S. R. Jaffrey. Single-nucleotide-  
923 resolution mapping of m6a and m6am throughout the transcriptome. *Nature methods*, 12(8):767–772, 2015.
- 924 [37] D. Maticzka, S. J. Lange, F. Costa, and R. Backofen. Graphprot: modeling binding preferences of rna-binding  
925 proteins. *Genome biology*, 15(1):1–18, 2014.
- 926 [38] K. D. Meyer. Dart-seq: an antibody-free method for global m6a detection. *Nature methods*, 16(12):1275–1280,  
927 2019.
- 928 [39] J. M. Molleston and S. Cherry. Attacked from all sides: Rna decay in antiviral defense. *Viruses*, 9(1):2, 2017.

TOWARDS IN-SILICO CLIP-SEQ: PREDICTING PROTEIN-RNA INTERACTION VIA SEQUENCE-TO-SIGNAL  
LEARNING

- 929 [40] A. Palmisano, S. Vural, Y. Zhao, and D. Sonkin. MutSpliceDB: A database of splice sites variants  
930 with RNA-seq based evidence on effects on splicing. *Human Mutation*, 42(4):342–345, 2021. [\\_eprint:  
931 https://onlinelibrary.wiley.com/doi/pdf/10.1002/humu.24185](https://onlinelibrary.wiley.com/doi/pdf/10.1002/humu.24185).
- 932 [41] X. Pan, P. Rijnbeek, J. Yan, and H.-B. Shen. Prediction of rna-protein sequence and structure binding preferences  
933 using deep convolutional and recurrent neural networks. *BMC genomics*, 19(1):1–11, 2018.
- 934 [42] C. Y. Park, J. Zhou, A. K. Wong, K. M. Chen, C. L. Theesfeld, R. B. Darnell, and O. G. Troyanskaya. Genome-  
935 wide landscape of rna-binding protein target site dysregulation reveals a major impact on psychiatric disorder risk.  
936 *Nature genetics*, 53(2):166–173, 2021.
- 937 [43] I. Paz, I. Kostı, M. Ares Jr, M. Cline, and Y. Mandel-Gutfreund. Rbpmap: a web server for mapping binding sites  
938 of rna-binding proteins. *Nucleic acids research*, 42(W1):W361–W367, 2014.
- 939 [44] A. R. Quinlan and I. M. Hall. Bedtools: a flexible suite of utilities for comparing genomic features. *Bioinformatics*,  
940 26(6):841–842, 2010.
- 941 [45] D. Ray, H. Kazan, E. T. Chan, L. P. Castillo, S. Chaudhry, S. Talukder, B. J. Blencowe, Q. Morris, and T. R.  
942 Hughes. Rapid and systematic analysis of the rna recognition specificities of rna-binding proteins. *Nature*  
943 *biotechnology*, 27(7):667–670, 2009.
- 944 [46] D. Ray, H. Kazan, K. B. Cook, M. T. Weirauch, H. S. Najafabadi, X. Li, S. Gueroussov, M. Albu, H. Zheng,  
945 A. Yang, et al. A compendium of rna-binding motifs for decoding gene regulation. *Nature*, 499(7457):172–177,  
946 2013.
- 947 [47] N. Schmidt, C. A. Lareau, H. Keshishian, S. Ganskih, C. Schneider, T. Hennig, R. Melanson, S. Werner, Y. Wei,  
948 M. Zimmer, et al. The sars-cov-2 rna–protein interactome in infected human cells. *Nature microbiology*,  
949 6(3):339–353, 2021.
- 950 [48] A. Shrikumar, P. Greenside, and A. Kundaje. Learning important features through propagating activation  
951 differences. In *International conference on machine learning*, pages 3145–3153. PMLR, 2017.
- 952 [49] Y. Sugimoto, J. König, S. Hussain, B. Zupan, T. Curk, M. Frye, and J. Ule. Analysis of clip and iclip methods for  
953 nucleotide-resolution studies of protein-rna interactions. *Genome biology*, 13(8):1–13, 2012.
- 954 [50] M. Sundararajan, A. Taly, and Q. Yan. Axiomatic attribution for deep networks. In *International Conference on*  
955 *Machine Learning*, pages 3319–3328. PMLR, 2017.
- 956 [51] S. Toneyan, Z. Tang, and P. K. Koo. Evaluating deep learning for predicting epigenomic profiles. *BioRxiv*, 2022.
- 957 [52] S. Tweedie, B. Braschi, K. Gray, T. E. M. Jones, R. Seal, B. Yates, and E. A. Bruford. Genenames.org: the HGNC  
958 and VGNC resources in 2021. *Nucleic Acids Research*, 49(D1):D939–D946, Jan. 2021.
- 959 [53] E. L. Van Nostrand, P. Freese, G. A. Pratt, X. Wang, X. Wei, R. Xiao, S. M. Blue, J.-Y. Chen, N. A. Cody,  
960 D. Dominguez, et al. A large-scale binding and functional map of human rna-binding proteins. *Nature*,  
961 583(7818):711–719, 2020.
- 962 [54] E. L. Van Nostrand, G. A. Pratt, A. A. Shishkin, C. Gelboin-Burkhart, M. Y. Fang, B. Sundararaman, S. M. Blue,  
963 T. B. Nguyen, C. Surka, K. Elkins, et al. Robust transcriptome-wide discovery of rna-binding protein binding sites  
964 with enhanced clip (eclip). *Nature methods*, 13(6):508–514, 2016.
- 965 [55] E. L. Van Nostrand, G. A. Pratt, B. A. Yee, E. C. Wheeler, S. M. Blue, J. Mueller, S. S. Park, K. E. Garcia,  
966 C. Gelboin-Burkhart, T. B. Nguyen, I. Rabano, R. Stanton, B. Sundararaman, R. Wang, X.-D. Fu, B. R. Graveley,  
967 and G. W. Yeo. Principles of RNA processing from analysis of enhanced CLIP maps for 150 RNA binding  
968 proteins. *Genome Biology*, 21(1):90, Apr. 2020.
- 969 [56] R. A. Varier, T. Sideri, C. Capitanchik, Z. Manova, E. Calvani, A. Rossi, R. Edupuganti, I. Ensinck, V. W. Chan,  
970 H. Patel, et al. m6a reader pho92 is recruited co-transcriptionally and couples translation efficacy to mrna decay to  
971 promote meiotic fitness in yeast. *bioRxiv*, 2022.
- 972 [57] Z. Yan, W. L. Hamilton, and M. Blanchette. Graph neural representational learning of rna secondary structures for  
973 predicting rna-protein interactions. *Bioinformatics*, 36(Supplement\_1):i276–i284, 2020.
- 974 [58] E.-W. Yang, J. H. Bahn, E. Y.-H. Hsiao, B. X. Tan, Y. Sun, T. Fu, B. Zhou, E. L. Van Nostrand, G. A. Pratt,  
975 P. Freese, et al. Allele-specific binding of rna-binding proteins reveals functional genetic variants in the rna.  
976 *Nature communications*, 10(1):1–15, 2019.

TOWARDS IN-SILICO CLIP-SEQ: PREDICTING PROTEIN-RNA INTERACTION VIA SEQUENCE-TO-SIGNAL LEARNING

977 **Figures**

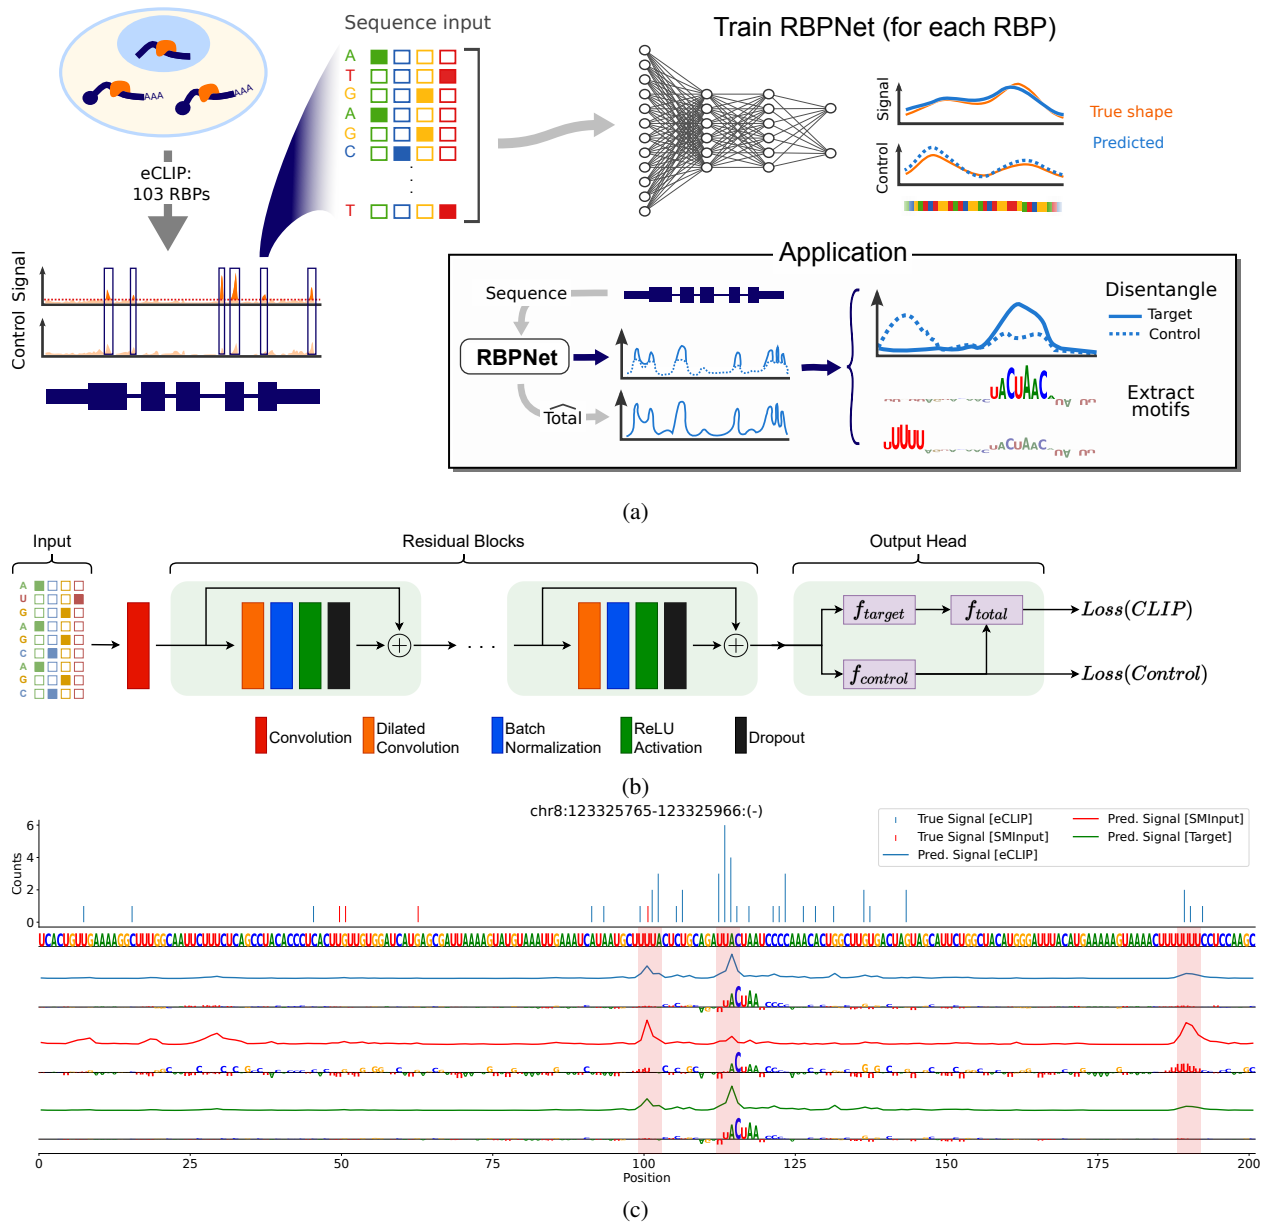

Figure 1: RBPNet overview. **A** Schematic outline of data preparation, RBPNet training and downstream applications. **B** RBPNet model architecture. The one-hot encoded RNA input sequence is first passed through a 1D convolutional layer, followed by several residual blocks, each consisting of a dilated convolution, batch normalization, ReLU and dropout, respectively. Probability vectors of the *target* and *control* tracks are predicted from the output of the last residual block via a transposed convolutional layer while the *total* track is given by an additive mixture of *target* and *control* tracks. Given the predictions, a loss is computed by taking the sum of the negative log-likelihoods of the observed total and control counts. **C** Example prediction of an RBPNet model trained on eCLIP data of QKI showing observed counts (top) and predicted count distributions for the total (blue), control (red) and target (green) tracks. Integrated gradients feature attribution maps with respect to each predict track are shown below.



TOWARDS IN-SILICO CLIP-SEQ: PREDICTING PROTEIN-RNA INTERACTION VIA SEQUENCE-TO-SIGNAL LEARNING

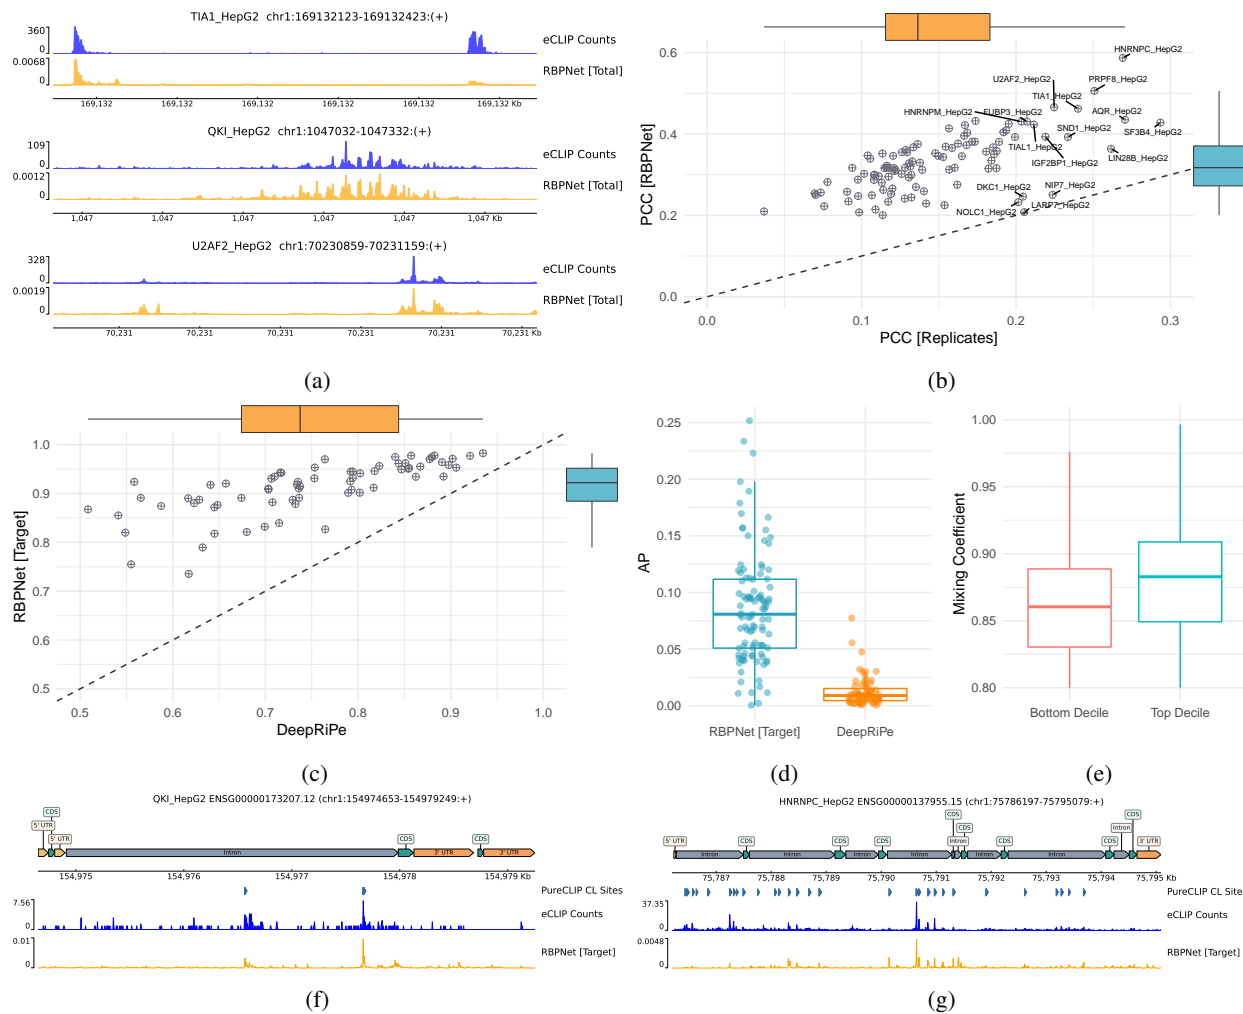

Figure 2: RBPNet prediction performance on ENCODE eCLIP datasets. **A** RBPNet predictions (total track) on the highest-count hold-out samples for TIA1, QKI and U2AF2. **B** Pearson correlation coefficient (PCC) of RBPNet predictions (total track) with observed eCLIP crosslink counts on hold-out samples vs. PCC of observed counts between the two eCLIP replicates. **C**, **D** Mean auROC and AP of RBPNet (target track) and DeepRiPe predictions with respect to crosslink and non-crosslink positions called by PureCLIP across transcripts from hold-out chromosomes, respectively. As pre-trained DeepRiPe models are available only for 70 (out of 103) ENCODE HepG2 RBPs, performance comparison is shown only for those RBPs. **E** Distribution of RBPNet mixing coefficients of the top and bottom decile ENCODE narrow peaks, sorted by eCLIP signal fold-change over the SMInput. High-affinity ENCODE narrow peaks show on average higher mixing coefficients compared to low-affinity peaks. **F**, **G** Example RBPNet (target track) whole-transcript predictions on ENSG00000173207.12 and ENSG00000137955.15, together with observed eCLIP counts and called PureCLIP peaks, for QKI and HNRNPC, respectively.

TOWARDS IN-SILICO CLIP-SEQ: PREDICTING PROTEIN-RNA INTERACTION VIA SEQUENCE-TO-SIGNAL LEARNING

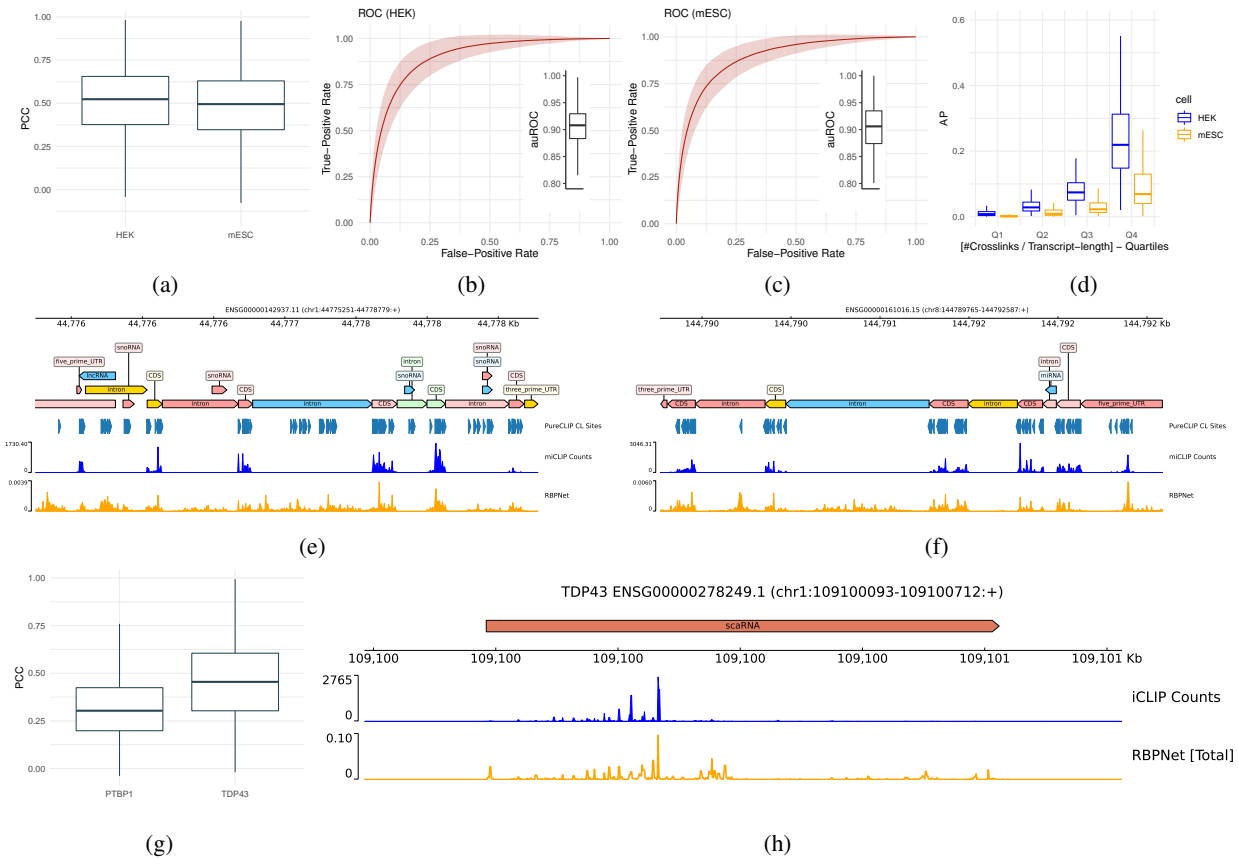

Figure 3: Evaluation of RBPNet on iCLIP and miCLIP data. As in contrast to mESC, no control signal is used for m6a peak calling on HEK data, we consequently used RBPNet target and total track predictions for auROC and AP computation for mESC and HEK, respectively. **A** RBPNet PCC performance on hold-out samples of miCLIP experiments in HEK293 and mESC cell lines. **B, C** ROC performance of RBPNet whole-transcript predictions with respect to crosslink and non-crosslink positions called by PureCLIP for HEK293 and mESC cell lines, respectively. **D** AP performance on HEK293 and mESC in across transcripts for different PureCLIP crosslink site frequency quartiles. **E, F** Example RBPNet-HEK293 miCLIP predictions on ENSG00000142937.11 and ENSG00000161016.15. Notably, both predicted signal shape and observed miCLIP signal occurs predominantly in CDS and UTR regions. **G** Test set PCC performance on iCLIP experiments for PTBP1 and TDP43. **H** Predicted RBPNet signal shape for SCARNA2 (ENSG00000278249.1).

TOWARDS IN-SILICO CLIP-SEQ: PREDICTING PROTEIN-RNA INTERACTION VIA SEQUENCE-TO-SIGNAL LEARNING

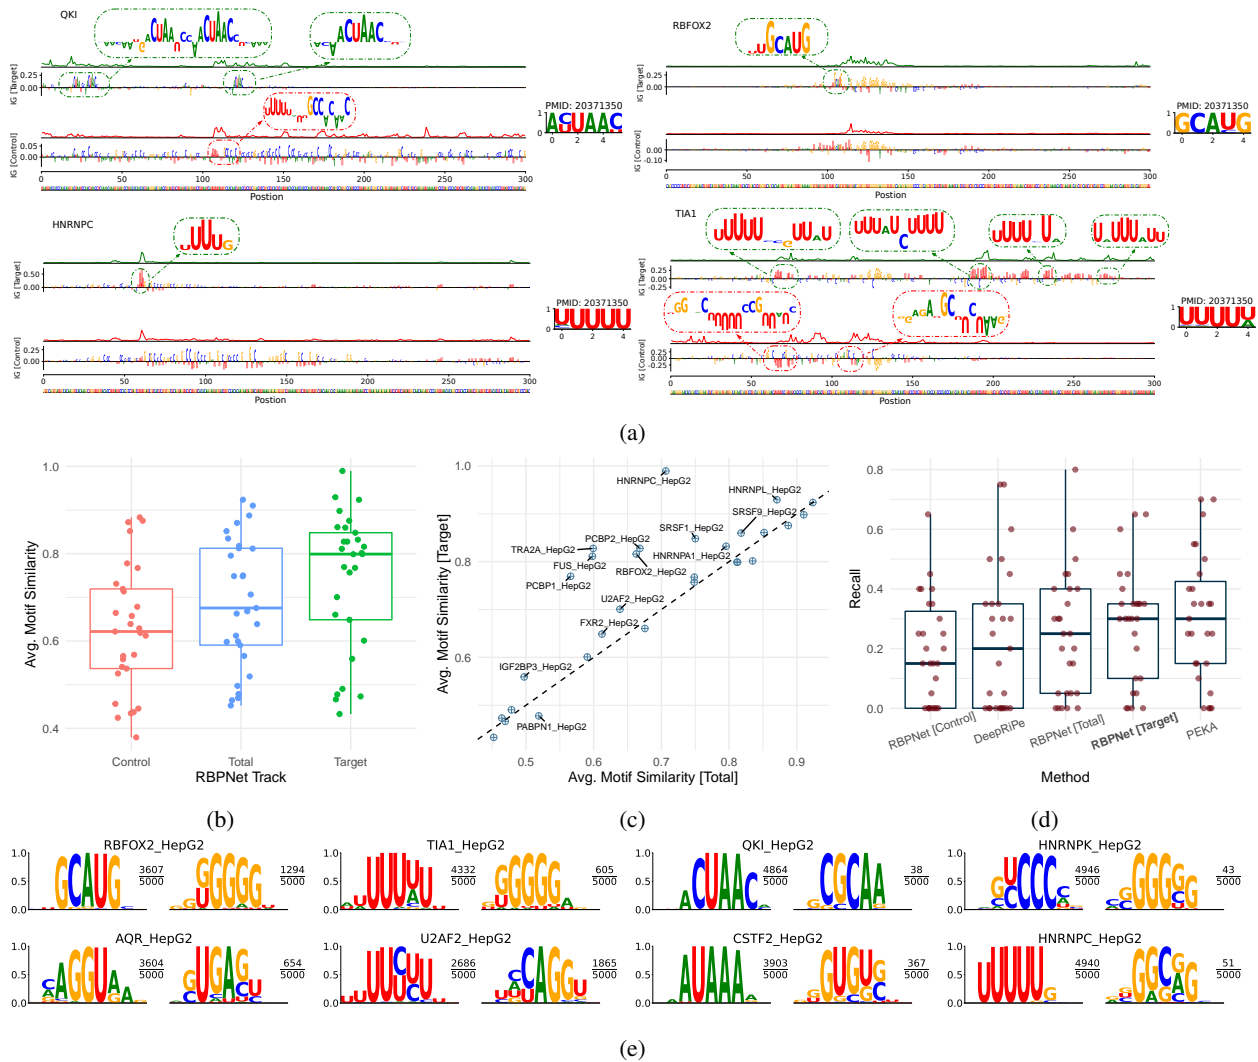

TOWARDS IN-SILICO CLIP-SEQ: PREDICTING PROTEIN-RNA INTERACTION VIA SEQUENCE-TO-SIGNAL LEARNING

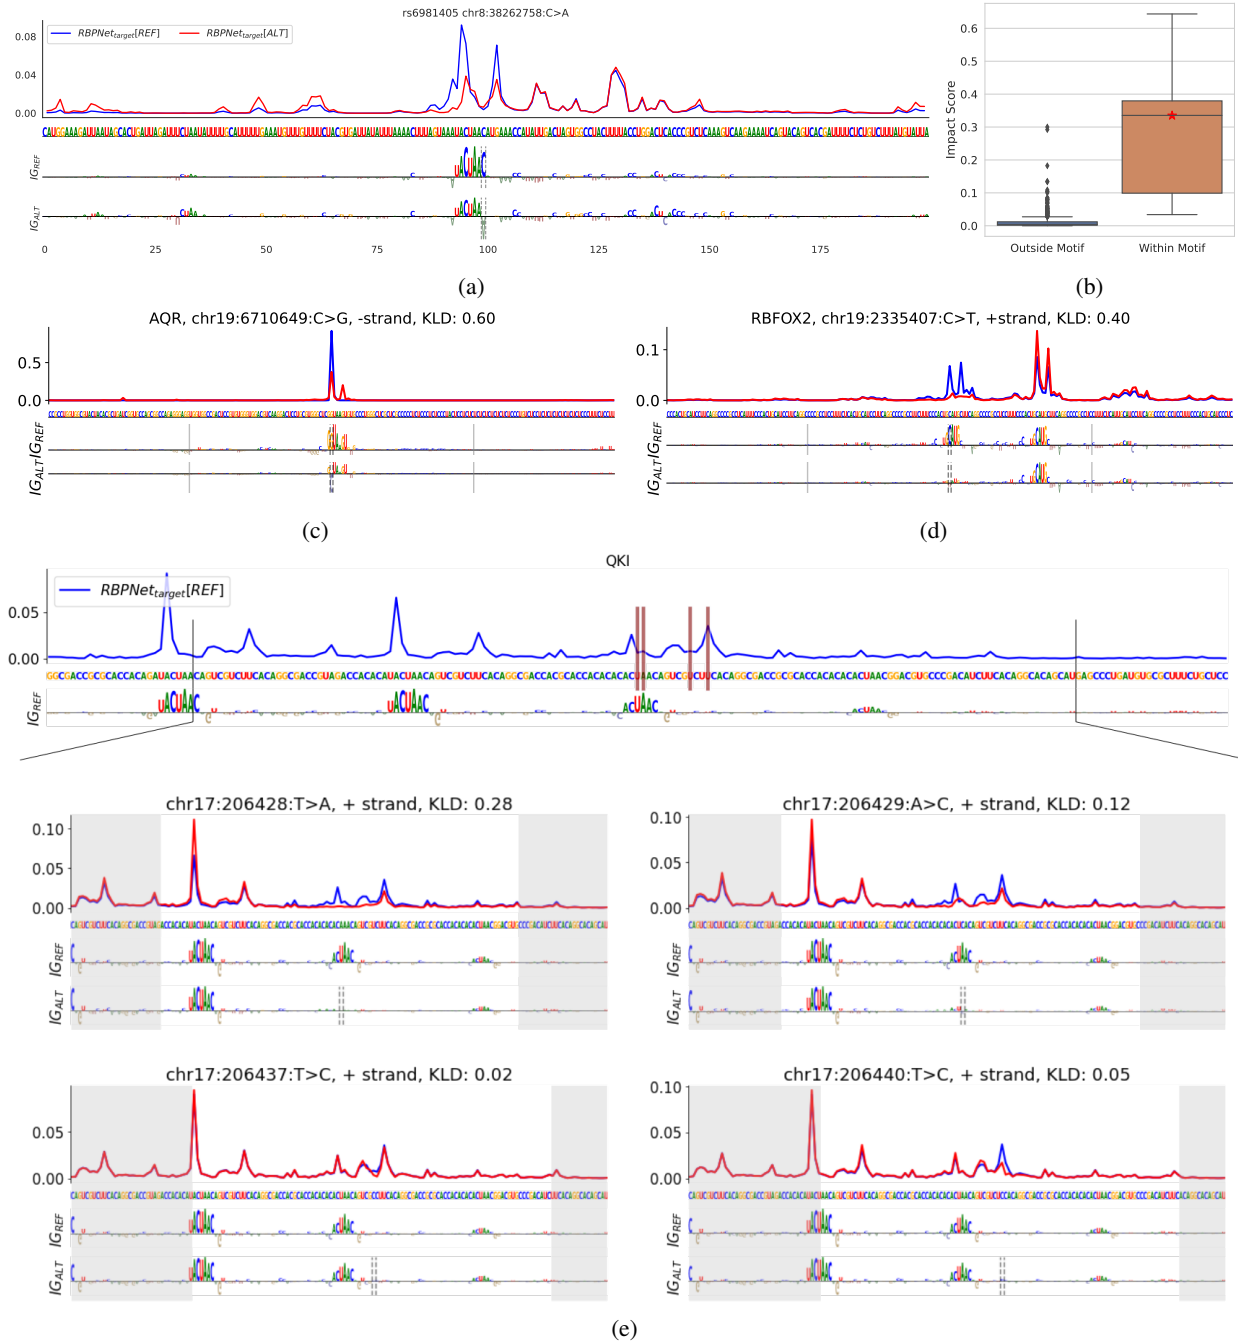

Figure 5: RBPNet variant impact prediction. **A** Impact of the *rs6981405* variant on the predicted RBPNet *target* signal. Reference (blue) and alternative (red) signal is shown in a 200nt window around the variant position. The corresponding feature importance maps for reference and alternative sequence are shown below. A C-to-A transversion at the 5' end of the QKI binding motif leads to a drastic change of the predicted signal compared to the reference signal. **B** Comparison of impact scores of a systematic *in silico* mutagenesis of each position towards each of the 3 alternative bases within in a 200nt sequence window around *rs6981405*. Note that mutating a nucleotide within the motif leads to a significantly higher variant impact score than outside the motif. The red star indicates the score of the observed *rs6981405* variant. For scoring variants we used KL-divergence between the reference and alternative profile. **C, D** Example impact predictions of the most significant allele-specific binding (ASB) events identified by [58] for AQR and RBFOX2. **E** Variant impact predictions for the QKI model in a region harboring 4 distinct SNVs associated with ASB. The top plot shows the reference sequence with the corresponding attribution map. The location of the SNVs within the sequence is highlighted with red bars. The 4 SNVs are displayed separately, showing a comparison of the predicted profile with the reference (top) together with the attribution maps of the reference and the alternative allele (bottom). The location of the variant is highlighted with a dashed grey line in the attribution map of the alternative allele. The grey boxes represent the margins of the KLD scoring window centered around the variant. RBPNet predicts notable allele specific effects for only 2 out of the 4 candidate SNVs, which coincide with QKI binding motifs. These SNVs are associated with a loss of the binding motif in the attribution map and a change in the predicted signal.

TOWARDS IN-SILICO CLIP-SEQ: PREDICTING PROTEIN-RNA INTERACTION VIA SEQUENCE-TO-SIGNAL LEARNING

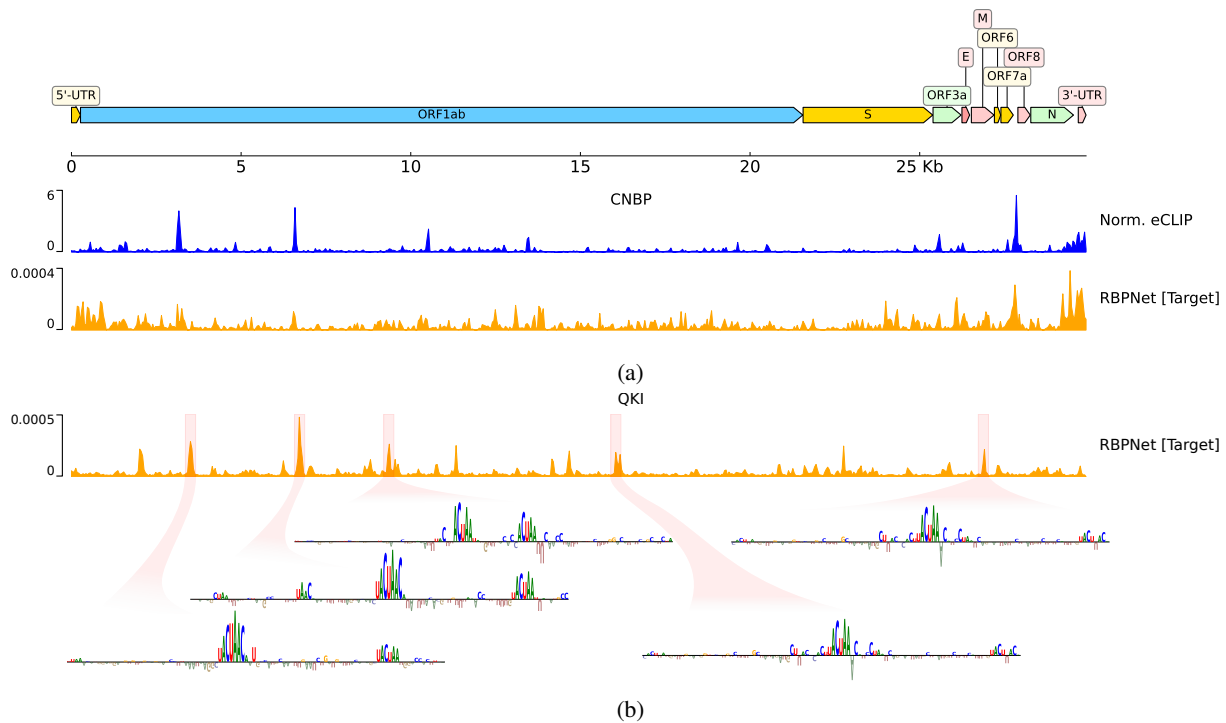

Figure 6: Predicting SARS-CoV-2 binding with RBPNet. The top shows target track predictions using a model trained on CNBP eCLIP data, together with the normalized observed signal taken from Schmidt et al. [47]. Shown below are predictions from a RBPNet-QKI model trained on ENCODE eCLIP data, as well as IG attribution maps around the top-5 positions with highest predicted probability.

978 **Supplementary Text**

979 **Variance of replicates**

Assume that  $x$  and  $y$  are repeated measurements with (unknown) mean  $m$  and independent noise with variance  $v$ . We have an estimate of the mean  $\hat{m}$ . We can calculate the expected squared derivation of the two replicates:

$$\mathbb{E}[(x - y)^2] = \mathbb{E}[(x - m - (y - m))^2] = 2v - 2\mathbb{E}[(x - m)(y - m)] = 2v ,$$

980 where the cross term disappears because the noise is assumed to be independent on the two replicates.

We can also calculate the squared difference between the estimate and a replicate:

$$\mathbb{E}[(x - \hat{m})^2] = v + (m - \hat{m})^2.$$

This results follows from the same type of reasoning as above. From these two results we can see that if our estimator is equal to the true mean:  $\hat{m} = m$  then:

$$\mathbb{E}[(x - y)^2] = 2\mathbb{E}[(x - \hat{m})^2].$$

981 It follows that as the estimated mean  $\hat{m}$  approaches the true mean, the squared derivation of the two replicates exceeds  
982 the squared derivation of a replicate and  $\hat{m}$  by  $v$ .

983 **Supplementary Figures**

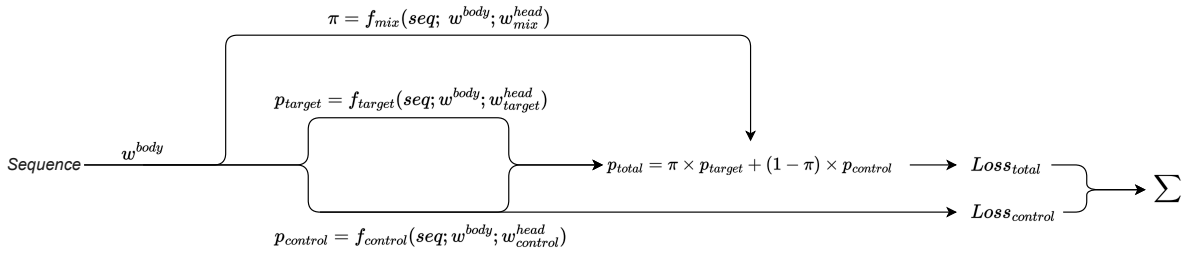

(a)

Supplementary Figure 1: RBPNet forward pass (with bias correction). The feature representation of the input RNA sequence (parameterized by  $w^{body}$ ) is used to compute the count distribution of the target ( $p_{target}$ ) and control ( $p_{control}$ ) tracks. The count distribution of the total track is then given by an additive mixture of target and control tracks, as well a mixing coefficient  $\pi \in [0, 1]$ . Given the observed counts of the CLIP and control experiment, losses are computed using the total and control tracks, respectively. The total loss is then given by the sum of the total and control track losses.

TOWARDS IN-SILICO CLIP-SEQ: PREDICTING PROTEIN-RNA INTERACTION VIA SEQUENCE-TO-SIGNAL LEARNING

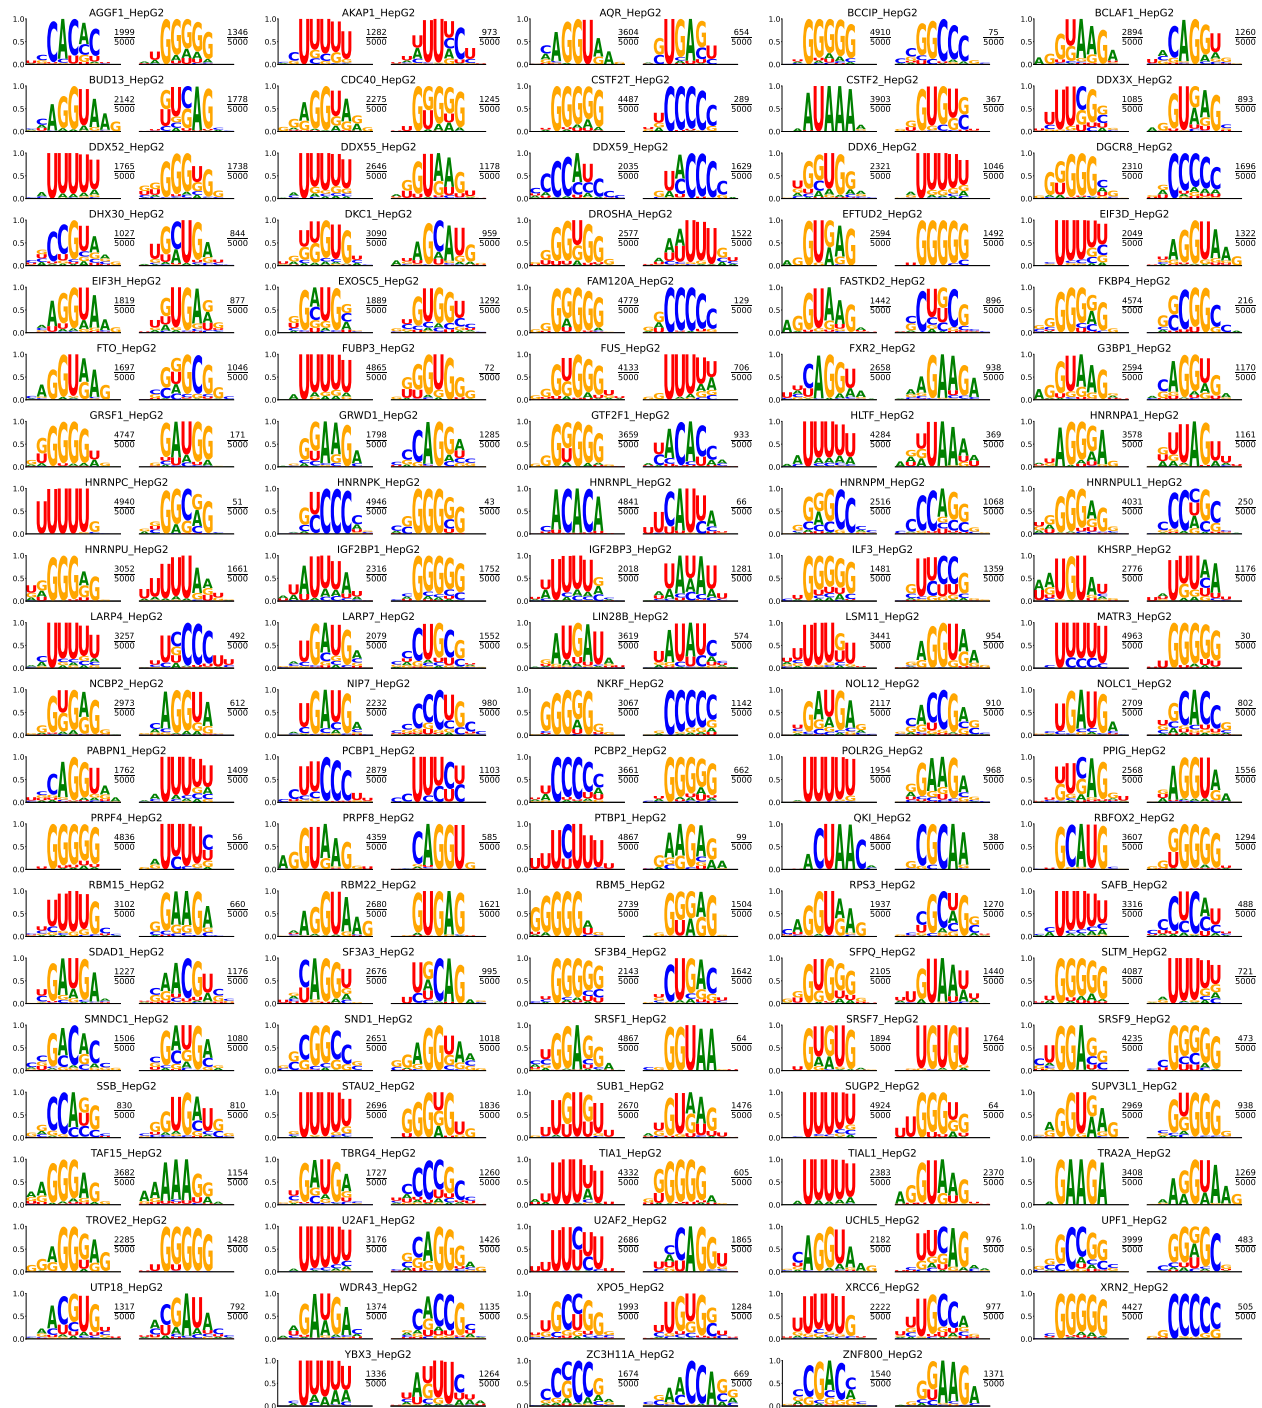

Supplementary Figure 2: Consensus motifs with highest and second-highest 5-mer support for all 103 ENCODE HepG2 eCLIP experiments.



TOWARDS IN-SILICO CLIP-SEQ: PREDICTING PROTEIN-RNA INTERACTION VIA SEQUENCE-TO-SIGNAL LEARNING

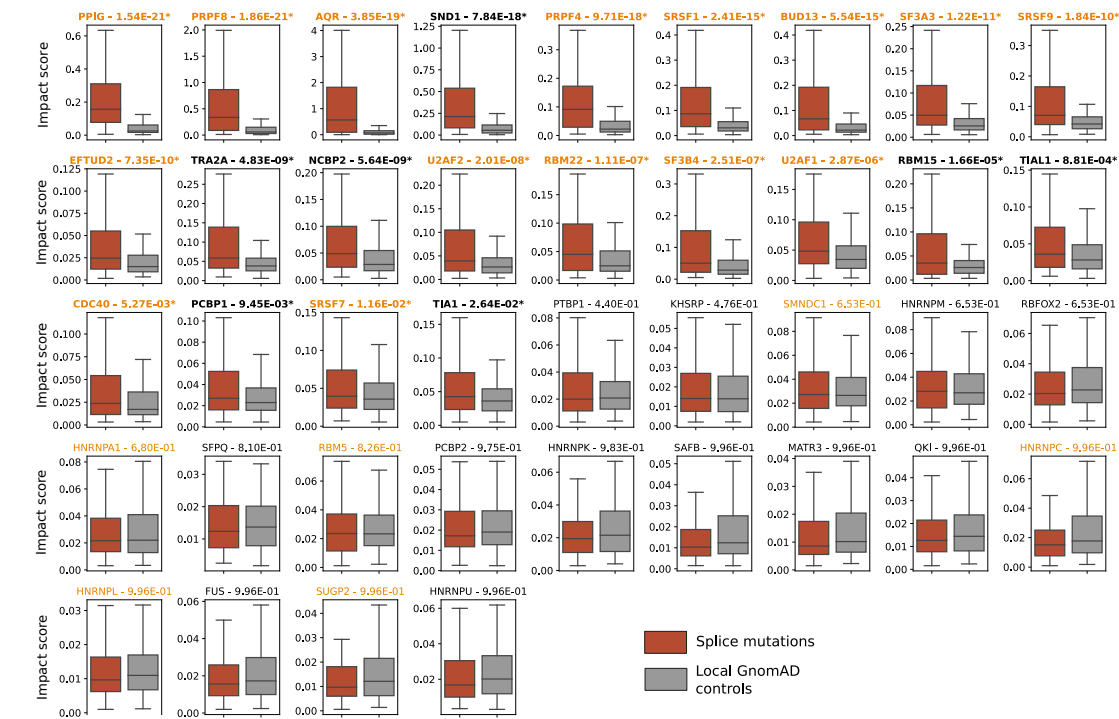

(a)

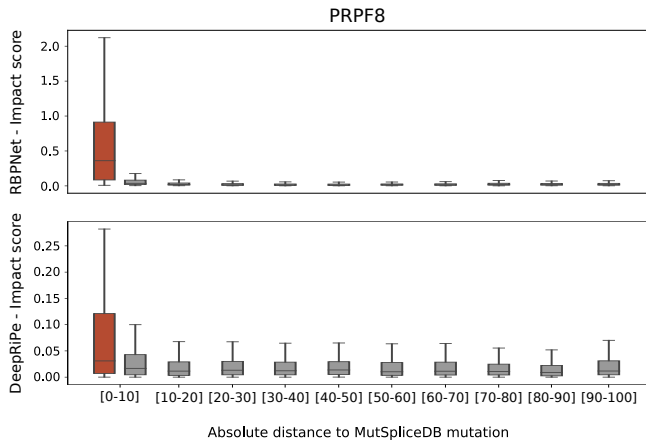

(b)

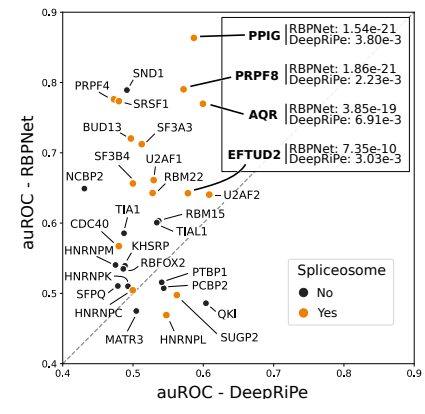

(c)

Supplementary Figure 3: Scoring of 232 splicing mutations from MutSpliceDB along with 6,087 control mutations from gnomAD taken in their vicinity, using 40 splicing-related RBPNet models. **A** Boxplots of RBPNet impact scores from splicing mutations and local controls per RBP. The 40 RBPs are ordered by their adjusted (Benjamini/Hochberg) P-values from Wilcoxon Signed Rank tests. Title in bold: RBPs with significant P-values at  $\alpha = 0.05$  (22/40); orange font color indicates the spliceosomal RBPs. **B** Impact score distribution for splice mutations (red boxplot) and gnomAD control mutations (grey boxplots) per absolute, relative-distance bin, with impact scores obtained from RBPNet and DeepRiPe models for the spliceosomal RBP PRPF8 (being the most significant model from DeepRiPe following the Wilcoxon Signed Rank tests). **C** Scatterplot of area under the Receiver Operating Curve (auROC) calculated from RBPNet models (y) and DeepRiPe models (x). All 30 RBPs annotated as splicing-related in common are depicted, with spliceosomal RBPs in orange. Four RBPs are specifically highlighted for being the only models showing significant P-values from the Wilcoxon signed rank tests applied on DeepRiPe models, and their adjusted P-values are reported (along the adjusted P-values for RBPNet).

TOWARDS IN-SILICO CLIP-SEQ: PREDICTING PROTEIN-RNA INTERACTION VIA SEQUENCE-TO-SIGNAL LEARNING

984 **Supplementary Tables**

Supplementary Table 1: AP and auROC performance of RBPNet (target track) on 103 ENCODE eCLIP experiments from the HepG2 cell line.

|    | RBP_CELL       | AP   | auROC |     | RBP_CELL      | AP   | auROC |
|----|----------------|------|-------|-----|---------------|------|-------|
| 1  | AGGF1_HepG2    | 0.02 | 0.83  | 53  | NKRF_HepG2    | 0.05 | 0.89  |
| 2  | AKAP1_HepG2    | 0.05 | 0.88  | 54  | NOL12_HepG2   | 0.15 | 0.81  |
| 3  | AQR_HepG2      | 0.15 | 0.83  | 55  | NOLC1_HepG2   | 0.18 | 0.76  |
| 4  | BCCIP_HepG2    | 0.08 | 0.95  | 56  | PABPN1_HepG2  | 0.05 | 0.89  |
| 5  | BCLAF1_HepG2   | 0.10 | 0.94  | 57  | PCBP1_HepG2   | 0.09 | 0.87  |
| 6  | BUD13_HepG2    | 0.09 | 0.92  | 58  | PCBP2_HepG2   | 0.14 | 0.97  |
| 7  | CDC40_HepG2    | 0.05 | 0.87  | 59  | POLR2G_HepG2  | 0.09 | 0.97  |
| 8  | CSTF2_HepG2    | 0.12 | 0.93  | 60  | PPIG_HepG2    | 0.11 | 0.96  |
| 9  | CSTF2T_HepG2   | 0.07 | 0.94  | 61  | PRPF4_HepG2   | 0.11 | 0.95  |
| 10 | DDX3X_HepG2    | 0.09 | 0.95  | 62  | PRPF8_HepG2   | 0.22 | 0.97  |
| 11 | DDX52_HepG2    | 0.09 | 0.87  | 63  | PTBP1_HepG2   | 0.25 | 0.93  |
| 12 | DDX55_HepG2    | 0.07 | 0.89  | 64  | QKI_HepG2     | 0.17 | 0.96  |
| 13 | DDX59_HepG2    | 0.05 | 0.87  | 65  | RBFOX2_HepG2  | 0.11 | 0.96  |
| 14 | DDX6_HepG2     | 0.00 | 0.89  | 66  | RBM15_HepG2   | 0.08 | 0.91  |
| 15 | DGCR8_HepG2    | 0.08 | 0.82  | 67  | RBM22_HepG2   | 0.10 | 0.93  |
| 16 | DHX30_HepG2    | 0.04 | 0.87  | 68  | RBM5_HepG2    | 0.07 | 0.84  |
| 17 | DKC1_HepG2     | 0.11 | 0.74  | 69  | RPS3_HepG2    | 0.12 | 0.95  |
| 18 | DROSHA_HepG2   | 0.04 | 0.86  | 70  | SAFB_HepG2    | 0.09 | 0.90  |
| 19 | EFTUD2_HepG2   | 0.04 | 0.84  | 71  | SDAD1_HepG2   | 0.08 | 0.68  |
| 20 | EIF3D_HepG2    | 0.05 | 0.91  | 72  | SF3A3_HepG2   | 0.12 | 0.91  |
| 21 | EIF3H_HepG2    | 0.04 | 0.92  | 73  | SF3B4_HepG2   | 0.12 | 0.96  |
| 22 | EXOSC5_HepG2   | 0.01 | 0.64  | 74  | SFPQ_HepG2    | 0.04 | 0.88  |
| 23 | FAM120A_HepG2  | 0.08 | 0.94  | 75  | SLTM_HepG2    | 0.05 | 0.92  |
| 24 | FASTKD2_HepG2  | 0.06 | 0.90  | 76  | SMNDC1_HepG2  | 0.19 | 0.82  |
| 25 | FKBP4_HepG2    | 0.17 | 0.92  | 77  | SND1_HepG2    | 0.12 | 0.96  |
| 26 | FTO_HepG2      | 0.04 | 0.83  | 78  | SRSF1_HepG2   | 0.12 | 0.97  |
| 27 | FUBP3_HepG2    | 0.10 | 0.93  | 79  | SRSF7_HepG2   | 0.10 | 0.93  |
| 28 | FUS_HepG2      | 0.07 | 0.90  | 80  | SRSF9_HepG2   | 0.15 | 0.94  |
| 29 | FXR2_HepG2     | 0.05 | 0.96  | 81  | SSB_HepG2     | 0.01 | 0.58  |
| 30 | G3BP1_HepG2    | 0.03 | 0.90  | 82  | STAU2_HepG2   | 0.07 | 0.91  |
| 31 | GRSF1_HepG2    | 0.02 | 0.79  | 83  | SUB1_HepG2    | 0.04 | 0.88  |
| 32 | GRWD1_HepG2    | 0.10 | 0.95  | 84  | SUGP2_HepG2   | 0.06 | 0.91  |
| 33 | GTF2F1_HepG2   | 0.10 | 0.90  | 85  | SUPV3L1_HepG2 | 0.09 | 0.74  |
| 34 | HLTF_HepG2     | 0.04 | 0.89  | 86  | TAF15_HepG2   | 0.07 | 0.89  |
| 35 | HNRNPA1_HepG2  | 0.11 | 0.93  | 87  | TBRG4_HepG2   | 0.00 | 0.70  |
| 36 | HNRNPC_HepG2   | 0.23 | 0.98  | 88  | TIA1_HepG2    | 0.08 | 0.93  |
| 37 | HNRNPK_HepG2   | 0.16 | 0.98  | 89  | TIAL1_HepG2   | 0.10 | 0.95  |
| 38 | HNRNPL_HepG2   | 0.16 | 0.98  | 90  | TRA2A_HepG2   | 0.12 | 0.77  |
| 39 | HNRNPM_HepG2   | 0.09 | 0.97  | 91  | TROVE2_HepG2  | 0.10 | 0.86  |
| 40 | HNRNPU_HepG2   | 0.05 | 0.90  | 92  | U2AF1_HepG2   | 0.12 | 0.95  |
| 41 | HNRNPUL1_HepG2 | 0.05 | 0.83  | 93  | U2AF2_HepG2   | 0.16 | 0.98  |
| 42 | IGF2BP1_HepG2  | 0.07 | 0.94  | 94  | UCHL5_HepG2   | 0.09 | 0.93  |
| 43 | IGF2BP3_HepG2  | 0.04 | 0.93  | 95  | UPF1_HepG2    | 0.04 | 0.89  |
| 44 | ILF3_HepG2     | 0.04 | 0.91  | 96  | UTP18_HepG2   | 0.08 | 0.74  |
| 45 | KHSRP_HepG2    | 0.07 | 0.89  | 97  | WDR43_HepG2   | 0.09 | 0.74  |
| 46 | LARP4_HepG2    | 0.07 | 0.88  | 98  | XPO5_HepG2    | 0.01 | 0.82  |
| 47 | LARP7_HepG2    | 0.20 | 0.79  | 99  | XRCC6_HepG2   | 0.04 | 0.88  |
| 48 | LIN28B_HepG2   | 0.04 | 0.91  | 100 | XRN2_HepG2    | 0.09 | 0.92  |
| 49 | LSM11_HepG2    | 0.04 | 0.87  | 101 | YBX3_HepG2    | 0.02 | 0.82  |
| 50 | MATR3_HepG2    | 0.08 | 0.97  | 102 | ZC3H11A_HepG2 | 0.06 | 0.88  |
| 51 | NCBP2_HepG2    | 0.09 | 0.91  | 103 | ZNF800_HepG2  | 0.09 | 0.95  |
| 52 | NIP7_HepG2     | 0.09 | 0.84  |     |               |      |       |
